# Supplementary material
Source: ML conference proceedings conference paper supplement (https://openreview.net/forum?id=UN4zB8oH9S)
Supplement: supplementary_material [file Recursive_PBRL_include_appendix.pdf › RPBRL-supplementary material/Recursive_PBRL_include_appendix.pdf]

---

# Deep Actor-Critics with Tight Risk Certificates

---

Anonymous Author(s)

Affiliation

Address

email

## Abstract

After a period of research, deep actor-critic algorithms have reached a level where they influence our everyday lives. They serve as the driving force behind the continual improvement of large language models through user-collected feedback. However, their deployment in physical systems is not yet widely adopted, mainly because no validation scheme that quantifies their risk of malfunction. We demonstrate that it is possible to develop tight risk certificates for deep actor-critic algorithms that predict generalization performance from validation-time observations. Our key insight centers on the effectiveness of minimal evaluation data. Surprisingly, a small feasible of evaluation roll-outs collected from a pretrained policy suffices to produce accurate risk certificates when combined with a simple adaptation of PAC-Bayes theory. Specifically, we adopt a recently introduced recursive PAC-Bayes approach, which splits validation data into portions and recursively builds PAC-Bayes bounds on the excess loss of each portion’s predictor, using the predictor from the previous portion as a data-informed prior. Our empirical results across multiple locomotion tasks and policy expertise levels demonstrate risk certificates that are tight enough to be considered for practical use.

## 1 Introduction

Reinforcement Learning (RL) is transforming emerging AI technologies. Large language models incorporate human feedback via RL, thereby continually improving their accuracy [Christiano et al., 2017, Ziegler et al., 2019, DeepSeek-AI et al., 2025]. Generative AI is increasingly being integrated into agentic workflows to automate complex decision making tasks. RL has also shown great promise in the control of physical robotic systems. Recent deep actor-critic algorithms learned to make a legged robot walk after only 20 minutes of outdoor training in an online mode [Kostrikov et al., 2023]. Model-based extensions of actor-critic pipelines can also achieve sample-efficient visual-control tasks in diverse settings [Hafner et al., 2025, Zhang et al., 2023]. Despite the exciting results observed in experimental conditions, RL is used far less than classical approaches in physical robot control. This opportunity has largely been missed mainly because deep RL algorithms are overly sensitive to initial conditions and can change behavior drastically during training. Embodied intelligent systems have a high risk of causing harm when their generalization performance differs significantly from their observed validation performance. Predictable generalization performance is even more critical when these systems update their behavior based on interactions with humans.

There has been an effort to use learning-theoretic approaches to train high-capacity predictors with risk certificates, i.e., bounds that guarantee a predictor’s generalization performance. Typically, this performance is estimated from observed validation results, which may be misleading. *Probably Approximately Correct Bayesian (PAC-Bayes) theory* [McAllester, 1999, Alquier et al., 2024] provides risk certificates for stochastic predictors, relative to a prior distribution over the hypothesis space. In this framework, the computationally prohibitive capacity term is reduced to a Kullback-Leibler

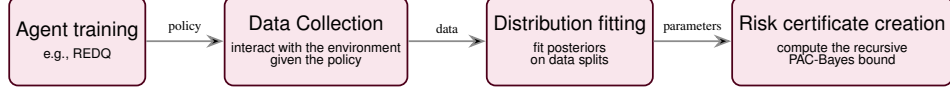

Figure 1: Our four steps to generate tight risk certificates for deep actor-critic algorithms.

divergence between the posterior and the prior, enabling the incorporation of domain knowledge into the analysis. Since we often deal with stochastic policies, relying on PAC-Bayes is a natural choice.

PAC-Bayes is the first and remains the most promising method for providing meaningful risk certificates to deep neural networks [Dziugaite and Roy, 2017, Pérez-Ortiz et al., 2021, Lotfi et al., 2022]. Further studies have improved the tightness, i.e., precision, of these certificates through the following techniques: (i) pretraining probabilistic neural nets on held-out data and using them as *data-informed priors* [Ambroladze et al., 2006, Dziugaite et al., 2021]; (ii) using pretrained networks as first-step predictors and developing PAC-Bayes guarantees on the residual of their predictions, termed the *excess loss*; and (iii) recursively repeating the first two steps on multiple data splits, a recent method known as the *Recursive PAC-Bayes* [Wu et al., 2024]. The scope of these exciting developments has thus far been limited to simple classification tasks with feedforward neural networks. Their application to deep actor-critic algorithms remains open, primarily because the mainstream PAC-Bayes bounds assume i.i.d. datasets, whereas RL assumes a controlled Markov chain.

We present a simple recipe for providing risk certificates for deep model-free actor-critic architectures. We find that, contrary to what one might expect, the three modern PAC-Bayesian learning tools mentioned above can successfully handle the high variance of Monte Carlo samples collected by running a pretrained policy network for multiple episodes in evaluation mode. Our approach proposes self-certified training of probabilistic neural networks on different splits of an i.i.d. data set containing return realizations of the policy, computed by first-visit Monte Carlo and post-processed through a simple thinning approach. We recursively build a PAC-Bayes bound on the excess losses of these networks, following a new adaptation of the recipe introduced by Wu et al. [2024]. Figure 1 illustrates our risk-certificate generation workflow. Our results highlight that the risk certificates get significantly tighter as the recursion depth increases. The final bounds are tight enough for practical use. Furthermore, the tightness of the risk certificates is proportional to the policy’s level of expertise.

## 2 Background

### 2.1 The state of the art of model-free deep actor-critic learning

Consider a set of states  $\mathcal{S}$  an agent may be in and an action space  $\mathcal{A}$  from which the agent can choose actions to interact with its environment. Denote by  $\Delta(\mathcal{S})$  and  $\Delta(\mathcal{A})$  the sets of probability distributions defined on  $\mathcal{S}$  and  $\mathcal{A}$ , respectively. We define a Markov Decision Process (MDP) [Puterman, 2014] as the tuple  $M = \langle \mathcal{S}, \mathcal{A}, r, P, P_0, \gamma \rangle$ , where  $r : \mathcal{S} \times \mathcal{A} \rightarrow [0, R]$  is a bounded reward function,  $P : \mathcal{S} \times \mathcal{A} \times \mathcal{S} \rightarrow [0, 1]$  is the state-transition kernel conditioned on a state-action pair; specifically  $P(s'|s, a)$  is the probability distribution of the next state  $s' \in \mathcal{S}$  given the current state-action pair  $(s, a) \in \mathcal{S} \times \mathcal{A}$ . We denote the initial-state distribution by  $P_0 \in \Delta(\mathcal{S})$ , the discount factor by  $\gamma \in (0, 1)$ , and let  $\pi : \mathcal{S} \times \mathcal{A} \rightarrow [0, 1]$  be a policy. The goal of RL is to learn a policy that maximizes the expected discounted return,  $\pi_* := \arg \max_{\pi \in \Pi} \mathbb{E}_{\tau_\pi} [\sum_{t=0}^{\infty} \gamma^t r(s_t, a_t)]$ . The expectation is taken with respect to the trajectory  $\tau_\pi := (s_0, a_0, s_1, a_1, s_2, a_2, \dots)$  of states and actions generated when a policy  $\pi$  chosen from a feasible set  $\Pi$  is executed. We refer to  $\pi_*$  as the optimal policy. The exact Bellman operator for a policy  $\pi$  is defined as

$$T_\pi Q(s, a) := r(s, a) + \gamma \mathbb{E}_{s' \sim P(\cdot|s, a)} [Q(s', \pi(s'))] \quad (1)$$

for some function  $Q : \mathcal{S} \times \mathcal{A} \rightarrow \mathbb{R}$ . The unique fixed point of this operator is the true action-value function  $Q_\pi$ , which maps a state-action pair  $(s, a)$  to the expected discounted sum of rewards the policy  $\pi$  collects when executed from  $(s, a)$ . In other words, the equality  $T_\pi Q(s, a) = Q(s, a)$  holds if and only if  $Q(s, a) = Q_\pi(s, a), \forall (s, a)$ . Any other  $Q$  incurs an error  $(T_\pi Q(s, a) - Q(s, a))^2$ , called the *Bellman error*. Common deep actor-critic methods approximate the true action-value function  $Q_\pi$  by one-step Temporal Difference (TD) learning that minimizes  $L(Q, \pi) := \mathbb{E}_{s \sim P_\pi} [(T_\pi Q(s, a) - Q(s, a))^2]$  with respect to  $Q$ , given a data set  $\mathcal{D}$  and  $P_\pi(s' \in A) = \mathbb{E}_{s \sim P_0} [\sum_{t \geq 0} P(s_t \in A | s_0 = s, \pi(s))]$  which is defined as the state-visitation distribution of policy  $\pi$  for some event  $A$  that belongs to the  $\sigma$ -algebra of the transition probability

distribution. Because the transition probabilities are unknown, the expectation term in Eq. 1 cannot be computed. Instead, the observed transitions are used to approximate it with a single-sample Monte Carlo estimate, yielding the training objective below:

$$\tilde{L}(Q) := \mathbb{E}_{s \sim P_\pi} \left[ \mathbb{E}_{s' \sim P(\cdot | s, \pi(s))} [(r(s, a) + \gamma Q(s', \pi(s')) - Q(s, a))^2] \right].$$

A deep actor-critic algorithm fits a neural-network function approximator  $Q$ , referred to as the critic, to a set of observed tuples  $(s, a, s')$  stored in a replay buffer  $\mathcal{D}$  by minimizing an empirical estimate of the stochastic loss:  $\hat{L}_\mathcal{D}(Q) := 1/|\mathcal{D}| \sum_{(s, a, s') \in \mathcal{D}} (\tilde{T}_\pi Q(s, a, s') - Q(s, a))^2$ . The critic is then used to train a policy network, or actor,  $\pi' \leftarrow \arg \max_\pi \mathbb{E}_{s \sim P_\pi} [Q(s, \pi(s))]$ . It is common practice to adopt the *Maximum-Entropy Reinforcement Learning* approach [Haarnoja et al., 2018a,b] to balance exploration and exploitation, thereby ensuring effective training. The approach supplements the reward function with a policy-entropy term  $r_{\text{MaxEnt}}(s, a) = r(s, a) + \alpha \mathbb{H}[\pi(\cdot | s)]$ , where  $\alpha \geq 0$  is a scaling hyperparameter tuned jointly with the actor and critic.

Performing off-policy TD learning with deep neural nets is notoriously unstable which is often attributed to the *deadly triad* [Sutton and Barto, 2018]. The main source of instability is the accumulation of errors from approximating  $T_\pi Q$  by its Monte Carlo estimate. Strategies to improve stability include maintaining Polyak-updated target networks [Lillicrap et al., 2016] and learning twin critics while using the minimum of their target-network outputs in Bellman target calculation [Fujimoto et al., 2018]. Empirically, training an ensemble of critic networks in a maximum-entropy setup largely mitigates these stability issues. We adopt REDQ [Chen et al., 2021], a state-of-the-art actor-critic method for model-free continuous control, as our representative approach. This choice is pragmatic rather than restrictive allowing us to trade the computational cost of a broader exploration of algorithms for a deeper, more comprehensive empirical evaluation of a single one.

## 2.2 Developing risk certificates with PAC-Bayes bounds

PAC-Bayes [McAllester, 1999, Alquier et al., 2024] offers a powerful way to understand and control how well learning algorithms generalize by blending prior beliefs with what we learn from data. *PAC-Bayesian learning* uses modern machine learning techniques to model  $\rho$  with complex function approximators and fit them to data. It has been successfully applied in both image classification [Dziugaite and Roy, 2017, Wu et al., 2024] and regression tasks [Reeb et al., 2018]. Its application to reinforcement learning has so far been limited to the design of critic training losses without rigorously quantifying the tightness of the performance guarantees [Tasdighi et al., 2024a,b].

**Notation.** Let  $\mathcal{H} : \mathcal{X} \rightarrow \mathcal{Y}$  be a set of feasible hypotheses and  $\ell : \mathcal{Y} \times \mathcal{Y} \rightarrow [0, 1]$  be a bounded loss function.<sup>1</sup> Further, let  $L(h) = \mathbb{E}_{(x, y) \sim P_D} [\ell(h(x), y)]$  be the expected error, where  $P_D$  is a distribution on  $\mathcal{X} \times \mathcal{Y}$ . The empirical loss is  $\hat{L}(h) = \frac{1}{N} \sum_{i=1}^N \ell(h(x_i), y_i)$  for a data set  $\mathcal{D} = \{(x_n, y_n) : n \in \{1, \dots, N\}\}$  of size  $N$  with  $(x_n, y_n) \sim P_D$ .  $\mathcal{P}$  is the set of distributions on  $\mathcal{H}$ . For two distributions  $\rho, \rho_0$  on  $\mathcal{H}$ , the Kullback-Leibler (KL) divergence is defined as  $\text{KL}(\rho \parallel \rho_0) \triangleq \mathbb{E}_{h \sim \rho} [\log \rho(h) - \log \rho_0(h)]$ . We use  $\text{kl}(p \parallel q) \triangleq p \log(p/q) + (1-p) \log((1-p)/(1-q))$  to denote the KL divergence between two Bernoulli distributions. PAC-Bayesian analysis [McAllester, 1999, Shawe-Taylor and Williamson, 1997, Alquier et al., 2024] develops bounds on the *expected loss*  $\mathbb{E}_{h \sim \rho} [L(h)]$ , under a posterior distribution  $\rho$  with respect to a prior distribution  $\rho_0$ , that hold with high probability. That is, they provide *risk certificates* for the generalization error. For brevity, we will use  $\mathbb{E}_\rho[\cdot] = \mathbb{E}_{h \sim \rho}[\cdot]$  throughout this paper. In the context of PAC-Bayes, the terms *posterior* and *prior* refer to distributions dependent and independent of the validation data, respectively. They are not to be understood in a Bayesian manner as being linked by a likelihood.<sup>2</sup> Which bounds one should choose to get the tightest risk certificates depends on the specific use case; see, e.g., Alquier et al. [2024] for a recent introduction and a survey of various bounds. In this work we rely on bounds derived from the kl divergence as they are tighter than the alternatives when no additional information about the data distribution is available, while noting that the same arguments apply to any other PAC-Bayesian bound.

### 2.2.1 PAC-Bayes-kl bound

Assuming the definitions given above, the *PAC-Bayes-kl bound* is given by

<sup>1</sup>Our discussion generalizes directly to any bounded loss within an interval  $[a, b]$  with  $a, b \in \mathbb{R}$ .

<sup>2</sup>See Germain et al. [2016] for results linking PAC-Bayes and Bayesian inference.

**Theorem 2.1** (PAC-Bayes-kl bound [Seeger, 2002, Maurer, 2004]). For any probability distribution  $\rho_0 \in \mathcal{P}$  that is independent of  $\mathcal{D}$  and any  $\delta \in (0, 1)$ , we have

$$\mathbb{P}\left(\exists \rho \in \mathcal{P} : \text{kl}(\mathbb{E}_\rho[\hat{L}(h)] \| \mathbb{E}_\rho[L(h)]) \geq (\text{KL}(\rho \| \rho_0) + \ln(2\sqrt{N}/\delta))/N\right) \leq \delta.$$

*Proof.* See, e.g., Maurer [2004] for a proof of the bound.  $\square$

We define the upper inverse of  $\text{kl}(\cdot \| \cdot)$  as  $\text{kl}^{-1,+}(\hat{p}, \varepsilon) \triangleq \max\{p : p \in [0, 1] \mid \text{kl}(\hat{p} \| p) \leq \varepsilon\}$  and the lower one as  $\text{kl}^{-1,-}(\hat{p}, \varepsilon) \triangleq \min\{p : p \in [0, 1], \text{kl}(\hat{p} \| p) \leq \varepsilon\}$  and cite the following inequality.

**Lemma 2.2** (kl-inequality [Langford, 2005, Foong et al., 2021, 2022]). Let  $Z_1, \dots, Z_N$  be i.i.d. random variables taking values on an interval  $[0, 1]$  and  $\mathbb{E}[Z_n] = p$  for all  $n$ . Let their empirical mean be  $\hat{p} = \frac{1}{N} \sum_{n=1}^N Z_n$ . Then, for any  $\delta \in (0, 1)$  we have

$$\mathbb{P}(\text{kl}(\hat{p} \| p) \geq \ln(1/\delta)/N) \leq \delta,$$

the inverse of which is given by

$$\mathbb{P}(p \geq \text{kl}^{-1,+}(\hat{p}, \ln(1/\delta)/N)) \leq \delta, \quad \text{and} \quad \mathbb{P}(p \leq \text{kl}^{-1,-}(\hat{p}, \ln(1/\delta)/N)) \leq \delta.$$

*Proof.* See Langford [2005], Corollary 3.7 for a proof of the bound.  $\square$

## 2.2.2 PAC-Bayes-Split-kl bound

Wu and Seldin [2022] generalize these bounds to random variables that take values in intervals  $[a, b]$  splitting each into two components that individually satisfy the constraints of the kl-inequality.

Let  $Z \in [a, b]$ , with  $a, b \in \mathbb{R}$ , be a random variable and set  $p = \mathbb{E}[Z]$ . For  $\mu \in [a, b]$  define  $Z^+ = \max\{0, Z - \mu\}$  and  $Z^- = \max\{0, \mu - Z\}$ , so that  $Z = \mu + Z^+ - Z^-$ . Let  $p^+ = \mathbb{E}[Z^+]$  and  $p^- = \mathbb{E}[Z^-]$  be their respective expectations, and let  $\hat{p}^+ = \frac{1}{N} \sum_{n=1}^N Z_n^+$  and  $\hat{p}^- = \frac{1}{N} \sum_{n=1}^N Z_n^-$  be their empirical means for an i.i.d. sample  $Z_1, \dots, Z_N$ . The *split-kl inequality* is stated below.

**Lemma 2.3** (Split-kl inequality [Wu and Seldin, 2022]). For any  $\mu \in [a, b]$  and  $\delta \in (0, 1)$

$$\mathbb{P}\left(p \leq \mu + (b - \mu)\text{kl}^{-1,+}\left(\frac{\hat{p}^+}{b - \mu}, \frac{\ln(2/\delta)}{N}\right) - (\mu - a)\text{kl}^{-1,-}\left(\frac{\hat{p}^-}{\mu - a}, \frac{\ln(2/\delta)}{N}\right)\right) \geq 1 - \delta.$$

*Proof.* The lemma follows by applying Lemma 2.2 to each of the kl terms and a union bound.  $\square$

For the PAC-Bayesian analogue, define  $\tilde{\ell} : \mathcal{Y} \times \mathcal{Y} \rightarrow [a, b]$ , where  $a, b \in \mathbb{R}$ . For  $\mu \in [a, b]$ , define  $\tilde{\ell}^+ = \max\{0, \tilde{\ell} - \mu\}$  and  $\tilde{\ell}^- = \max\{0, \mu - \tilde{\ell}\}$ .  $\tilde{L}^+(h) = \mathbb{E}_{(x,y) \sim P_D}[\tilde{\ell}^+(h(x), y)]$  and  $\hat{\tilde{L}}^+(h) = \frac{1}{N} \sum_{n=1}^N \tilde{\ell}^+(h(x_n), y_n)$  are the expected and empirical losses.  $\tilde{L}^-$  and  $\hat{\tilde{L}}^-$  are defined analogously. With these definitions, we now cite the PAC-Bayes-split-kl inequality.

**Theorem 2.4** (PAC-Bayes-Split-kl inequality [Wu and Seldin, 2022]). Let  $\tilde{\ell}$  and the remaining loss terms be defined as above. Then for any  $\rho_0$  on  $\mathcal{H}$  independent of  $\mathcal{D}$ , any  $\mu \in [a, b]$ , and any  $\delta \in (0, 1)$

$$\mathbb{P}\left(\exists \rho \in \mathcal{P} : \mathbb{E}_\rho[\tilde{L}(h)] \geq \mu + (b - \mu)\text{kl}^{-1,+}\left(\frac{\mathbb{E}_\rho[\hat{\tilde{L}}^+(h)]}{b - \mu}, \frac{\text{KL}(\rho \| \rho_0) + \ln(4\sqrt{N}/\delta)}{N}\right) - (\mu - a)\text{kl}^{-1,-}\left(\frac{\mathbb{E}_\rho[\hat{\tilde{L}}^-(h)]}{\mu - a}, \frac{\text{KL}(\rho \| \rho_0) + \ln(4\sqrt{N}/\delta)}{N}\right)\right) \leq \delta.$$

*Proof.* The theorem follows by applying Lemma 2.3 to the decomposition  $\mathbb{E}_\rho[\tilde{L}(h)] = \mu + \mathbb{E}_\rho[\tilde{L}^+(h)] - \mathbb{E}_\rho[\tilde{L}^-(h)]$ .  $\square$

### 2.2.3 Recursive PAC-Bayes bound

**Data-informed prior.** The tightness of PAC-Bayesian bounds is dominated by the KL divergence between the posterior  $\rho$  and the prior  $\rho_0$ . The better the prior guess is, the tighter the bound. Because the prior must be independent of the observed data, a common choice is to select a prior that is as uniform as possible over the hypothesis space. To improve upon this naïve choice, [Ambroladze et al. \[2006\]](#) proposed splitting the observed data into two disjoint subsets  $S_0$  and  $S_1$ , i.e.,  $\mathcal{D} = S_0 \cup S_1$ , using  $S_0$  to infer a *data-informed prior* and  $S_1$  to subsequently evaluate the bound. This approach balances the benefit of a better prior with the cost of having fewer observations to evaluate the bound.

**Excess loss.** The *excess loss*  $L^{\text{exc}}(h)$  with respect to a reference hypothesis  $h^* \in \mathcal{H}$  is defined as  $L^{\text{exc}}(h) = L(h) - L(h^*)$ . The excess-loss concept allows us to decompose the expected loss as  $\mathbb{E}_\rho[L(h)] = \mathbb{E}_\rho[L(h) - L(h^*)] + L(h^*)$ . Using  $S_0$  to construct both the prior  $\rho_0$  and the reference  $h^*$ , [Mhammedi et al. \[2019\]](#) showed that, assuming  $L(h^*)$  is close to  $L(h)$ , the excess loss has lower variance and thus yields a more efficient bound, while a bound on  $L(h^*)$  is independent of  $\text{KL}(\rho \parallel \rho_0)$  and can be obtained using standard generalization guarantees.

**Recursive PAC-Bayes.** [Wu et al. \[2024\]](#) generalized the excess loss further by introducing a scaling factor  $\kappa < 1$  to maintain a diminishing effect of recursions:  $\mathbb{E}_\rho[L(h)] = \mathbb{E}_\rho[L(h) - \kappa \mathbb{E}_{\rho_0}[L(h^*)]] + \kappa \mathbb{E}_{\rho_0}[L(h^*)]$ . Here, the first term reflects the excess loss with respect to a scaled version of the expected reference hypothesis loss under the prior  $\rho_0$ . The second term in turn is an expected loss again similar to the one on the left-hand side of the equation. Instead of adhering to a binary split  $\mathcal{D} = S_0 \cup S_1$  such that  $S_0 \cap S_1 = \emptyset$ , they propose to extend this decomposition recursively, by partitioning  $\mathcal{D}$  into  $T$  disjoint subsets,  $\mathcal{D} = \bigcup_{t=1}^T S_t$  and they define  $S_{\leq t} = \bigcup_{s=1}^t S_s$  and  $S_{\geq t} = \bigcup_{s=t}^T S_s$ . Their recursion is given by

$$\mathbb{E}_{\rho_t}[L(h)] = \mathbb{E}_{\rho_t}[L(h) - \kappa_t \mathbb{E}_{\rho_{t-1}}[L(h)]] + \kappa_t \mathbb{E}_{\rho_{t-1}}[L(h)], \quad (2)$$

for  $t \geq 2$ , and  $\kappa_1, \dots, \kappa_T$  are scaling factors. The distributions  $\rho_1, \dots, \rho_T \in \mathcal{H}$  form a sequence such that  $\rho_t$  depends solely on  $S_{\leq t}$  and  $S_{\geq t}$  to estimate  $\mathbb{E}_{\rho_t}[L(h)]$ .

While [Wu et al. \[2024\]](#) formulate their final recursive bound directly for a zero-one loss and PAC-Bayes split-kl bounds [\[Wu and Seldin, 2022\]](#), we present their result first in a general loss-agnostic form before we construct a specific bound in the next section.

**Theorem 2.5.** (Recursive PAC-Bayes bound.) *Let  $\mathcal{D} = S_1 \cup \dots \cup S_T$  be a disjoint decomposition of the set of observations  $\mathcal{D}$ . Let  $S_{\leq t}$  and  $S_{\geq t}$  be as defined above,  $N = |\mathcal{D}|$ , and  $N_t = |S_{\geq t}|$ . Let  $\kappa_1, \dots, \kappa_T$  be a sequence of scaling factors, where  $\kappa_t$  is allowed to depend on  $S_{\leq t-1}$ . Let  $\mathcal{P}_t$  be the set of distributions on  $\mathcal{H}$  which are allowed to depend on  $S_{\leq t}$ , and  $\rho_t \in \mathcal{P}_t$ . Then, for any  $\delta \in (0, 1)$ ,*

$$\mathbb{P}(\exists t \in [T], \rho_t \in \mathcal{P}_t \text{ such that } \mathbb{E}_{\rho_t}[L(h)] \geq \mathcal{B}_t(\rho_t)) \leq \delta,$$

where  $\mathcal{B}_t(\rho_t)$  is a generic PAC-Bayesian bound on  $\mathbb{E}_{\rho_t}[L(h)]$  defined recursively as follows.

$$\mathcal{B}_t(\rho_t) = \mathcal{E}_t(\rho_t, \kappa_t) + \kappa_t \mathcal{B}_{t-1}(\rho_{t-1}^*),$$

where  $\mathcal{B}_1(\rho_1)$  is a PAC-Bayes bound on  $\mathbb{E}_{\rho_1}[L(h)]$  with an uninformed prior and  $\mathcal{E}_t(\rho_t, \kappa_t)$  is a PAC-Bayes bound on the excess loss  $\mathbb{E}_{\rho_t}[L(h) - \kappa_t \mathbb{E}_{\rho_{t-1}^*}[L(h')]]$ .

*Proof.* Because  $\mathcal{B}_1(\rho_1)$  and  $\mathcal{E}_t(\rho_t, \kappa_t)$  are PAC-Bayes bounds by assumption, we have

$$\mathbb{P}(\exists \rho_1 \in \mathcal{P}_1 : \mathbb{E}_{\rho_1}[L(h)] \geq \mathcal{B}_1(\rho_1)) \leq \delta/T,$$

$$\text{and } \mathbb{P}(\exists \rho_t \in \mathcal{P}_t : \mathbb{E}_{\rho_t}[L(h) - \kappa_t \mathbb{E}_{\rho_{t-1}^*}[L(h')]] \geq \mathcal{E}_t(\rho_t, \kappa_t)) \leq \delta/T \text{ for } t \in \{2, \dots, T\}.$$

The claim follows by expected loss decomposition and the recursion.  $\square$

## 3 Recursive PAC-Bayesian risk certificates for reinforcement learning

Obtaining risk certificates involves four steps, following our conceptual structure in Figure 1.

(i) **Training an agent.** The chosen actor-critic algorithm, REDQ [\[Chen et al., 2021\]](#), which we use in our experiments, is trained until convergence or until a computational budget is exhausted, after which we freeze its policy parameters, e.g., the weights of the corresponding neural net.



202 **(ii) Collecting data.** After training the policy, we run an agent acting according to this policy for  
 203 several episodes. Although a PAC-Bayesian bound gets tighter as the number of data points increases,  
 204 we observe that even a relatively small number of evaluation roll-outs is sufficient to get tight results.

205 **(iii) Fitting the posteriors.** We rely on the discounted return as the prediction target rather than a  
 206 plain sum of rewards for several reasons. Short-term risks tend to be more relevant for decisions, as  
 207 longer-term risks depend on an increasing set of external, usually unaccountable, factors. Discounted  
 208 rewards also serve as a proxy for lifelong learning and policy evaluation as they generalize to non-  
 209 episodic data. That said, even though the original policy might be trained on discounted returns in  
 210 step (i), a valid bound could also be constructed by computing the non-discounted rewards from data  
 211 collected in (ii). As discussed in Section 2.2.3, we split the data into  $T$  disjoint subsets and train a  
 212 series of  $T$  last-layer Bayesian neural nets via first-visit Monte Carlo to infer distributions over  $S_{\leq t}$ .

213 **(iv) Construction of the bound.** As discussed above, we focus on a generally well-performing set of  
 214 kl-based bounds. We construct the following bounds for  $\mathcal{B}_1$  and  $\mathcal{E}_t$  ( $t \in \{1, \dots, T\}$ ).

215 **A bound for  $\mathcal{B}_1$ .** As  $\hat{L}(h)$  is bounded between  $[0, B]$ , we rescale its expectation and choose

$$\mathcal{B}_1(\rho_1) = B \text{kl}^{-1,+} \left( \frac{\mathbb{E}_{\rho}[\hat{L}(h)]}{B}, \frac{\text{KL}(\rho_1 \parallel \rho_0^*) + \ln(2T\sqrt{N}/\delta)}{N} \right),$$

216 where  $\rho_0^*$  is a data-independent prior distribution on  $\mathcal{H}$ . Given the result in Theorem 2.1, this is a  
 217 PAC-Bayesian bound on  $\mathbb{E}_{\rho_1}[L(h)]$ , i.e.,  $\mathbb{P}(\exists \rho_1 \in \mathcal{P}_1 : \mathbb{E}_{\rho_1}[L(h)] \geq \mathcal{B}_1(\rho_1)) \leq \delta/T$ .

218 **A bound for  $\mathcal{E}_t$ .** Let  $L_t^{\text{exc}}(h) = L(h) - \kappa_t \mathbb{E}_{\rho_{t-1}}[L(h')] \in [-\kappa_t B, B]$ . For  $\mu \in [-\kappa_t B, B]$ ,  
 219 define  $L_t^{\text{exc}+}(h) = \max\{0, L_t^{\text{exc}}(h) - \mu\}$  and  $L_t^{\text{exc}-}(h) = \max\{0, \mu - L_t^{\text{exc}}(h)\}$ , with  $\hat{L}_t^{\text{exc}+}(h)$  and  
 220  $\hat{L}_t^{\text{exc}-}(h)$  as their empirical analogues. We set

$$\begin{aligned} \mathcal{E}_t(\rho_t) = & \mu + (B - \mu) \text{kl}^{-1,+} \left( \frac{\mathbb{E}_{\rho_t}[\hat{L}_t^{\text{exc}+}(h)]}{B - \mu}, \frac{\text{KL}(\rho_t \parallel \rho_{t-1}^*) + \ln(4T\sqrt{N_t}/\delta)}{N_t} \right) \\ & - (\mu + \kappa_t B) \text{kl}^{-1,-} \left( \frac{\mathbb{E}_{\rho_t}[\hat{L}_t^{\text{exc}-}(h)]}{\mu + \kappa_t B}, \frac{\text{KL}(\rho_t \parallel \rho_{t-1}^*) + \ln(4T\sqrt{N_t}/\delta)}{N_t} \right), \end{aligned}$$

221 where  $\rho_{t-1}^*$  is a distribution on  $\mathcal{H}$  informed by  $S_{\leq t-1}$ . Via Theorem 2.4 this is a PAC-Bayesian  
 222 bound on  $\mathbb{E}_{\rho_t}[L_t^{\text{exc}}]$  that holds with a probability greater than  $1 - \delta/T$ , i.e.,

$$\mathbb{P}(\exists \rho_t \in \mathcal{P}_t \text{ such that } \mathbb{E}_{\rho_t}[L_t^{\text{exc}}(h)] \geq \mathcal{E}_t(\rho_t)) \leq \delta/T.$$

223 Applying this construction recursively with  $T$  steps therefore gives us a recursive PAC-Bayesian  
 224 bound that holds with probability greater than  $1 - \delta$ .

## 225 4 Experiments

226 We perform experiments to answer the following three questions: **(Q1)** Can the test-time return of  
 227 a policy  $\pi$  be predicted with high precision across a range of environments and policies of varying  
 228 expertise? **(Q2)** What is the influence of a PAC-Bayes bound's structure? **(Q3)** How does the  
 229 validation set size influence the tightness of the risk certificate guarantee?

### 230 4.1 Experiment design

231 To evaluate our certificate-generation pipeline at an error tolerance of  $\delta = 0.025$ , we choose REDQ  
 232 [Chen et al., 2021] as a representative state-of-the-art, sample-efficient, model-free continuous control  
 233 algorithm. All REDQ hyperparameters follow those in the original paper. We first train a REDQ agent  
 234 for 300 000 steps using an ensemble of ten critics, randomly sampling two at each Bellman-target  
 235 evaluation for min-clipping. The learned policy is then run in evaluation mode for 100 episodes. The  
 236 resulting state transitions and rewards are stored as the data set used for bound fitting. Subsequently,  
 237 we run the trained policy for another 100 episodes to obtain a test dataset to compute a proxy for the  
 238 generalization performance. We predict the discounted return of the policy on the test set by fitting a  
 239 PAC-Bayes bound using observations from the validation set.

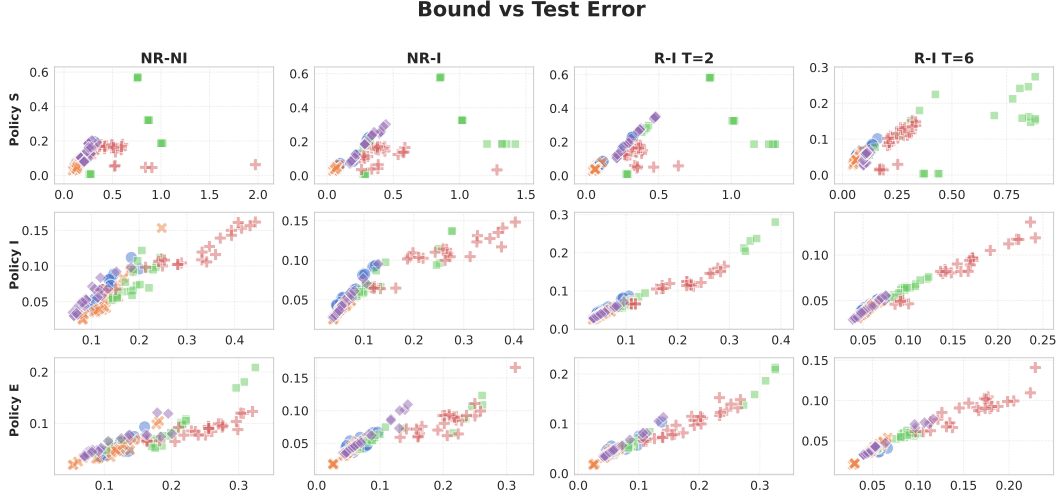

Figure 2: *Correlation plots.* PAC-Bayes bounds, one in each column, are plotted on the x-axis against true test errors on the y-axis for each method across all environments, policy instances, and repetitions to visualize correlation. Environments are color-coded as follows: Ant (blue circle), Half-Cheetah (orange cross), Hopper (green square), Humanoid (red plus), and Walker2d (purple diamond).

240 We evaluate and compare the final posterior loss  $\rho$  on the full training data, and on the held-out  
 241 test data, alongside the corresponding PAC-Bayes bounds across all methods and environments. To  
 242 mitigate the overfitting common in continuous-control settings, where consecutive samples are highly  
 243 correlated, we apply a thinning strategy that reduces redundancy while preserving data diversity.  
 244 Full details on each experiment are provided in Appendix D. We provide an implementation at  
 245 anonymous.

246 **Policy instances.** We define a policy instance as the output of a single policy-training round. In our  
 247 experiments, we consider five policy instances, each obtained by running the REDQ algorithm with a  
 248 different initial seed. Due to the stochastic nature of initialization and training, each instance follows  
 249 a unique trajectory. We construct individual bounds for each instance and report them in Appendix D.  
 250 To account for randomness in the risk certificate generation process, we repeat the procedure five  
 251 times for every policy instance. To address question (Q2), we create separate risk certificates for  
 252 three training stages of each policy, each reflecting a different level of expertise: *Starter (S)* for a  
 253 policy trained for 100 000 steps, *Intermediate (I)* for 200 000 steps, and *Expert (E)* for 300 000 steps,  
 254 after which no performance improvement observed.

255 **Environments.** We evaluate five MuJoCo environments: Ant, Half-Cheetah, Hopper, Humanoid,  
 256 and Walker2d [Todorov et al., 2012] due to their widespread use in the community and the represen-  
 257 tative value of the platforms for real-world use cases. Risk certificates may be particularly interesting  
 258 for mobile platforms that interact with their surroundings as well as humans.

259 **Baselines.** We design our baselines with the following points in mind: 1. how well a PAC-Bayes  
 260 bound predicts test-time performance, 2. whether informative priors yield tighter guarantees, 3.  
 261 whether the bound gets tighter when the recursive scheme is used, and 4. whether increasing the  
 262 recursion depth improve tightness. As this is the first work to evaluate generalization bounds tailored  
 263 for continuous control with deep actor-critics, there are no existing baselines for comparison. We  
 264 consider two non-recursive (NR) baselines: *non-informed (NR-NI)*, a PAC-Bayes-kl inverse bound  
 265 (see Theorem 2.1) with a non-informative prior that is independent of the training data, and *informed*  
 266 (*NR-I*), a data-informed variant in which the dataset is split equally into  $\mathcal{D} = \mathcal{D}_{\text{prior}} \cup \mathcal{D}_{\text{bound}}$ , allowing  
 267 the prior to depend on  $\mathcal{D}_{\text{prior}}$  and the empirical loss to be computed on  $\mathcal{D}_{\text{bound}}$ . We evaluate two  
 268 recursion (R) depths, *depth two (R-I T=2)* and *depth six (R-I T=6)*, to test the effect of recursion.

269 **Performance metrics.** We evaluate the bounds based on three metrics: *Normalized bound value:* To  
 270 ensure comparability across environments with different reward scales, we normalize the squared  
 271 discounted return prediction errors by the maximum observed return during training. A value close to

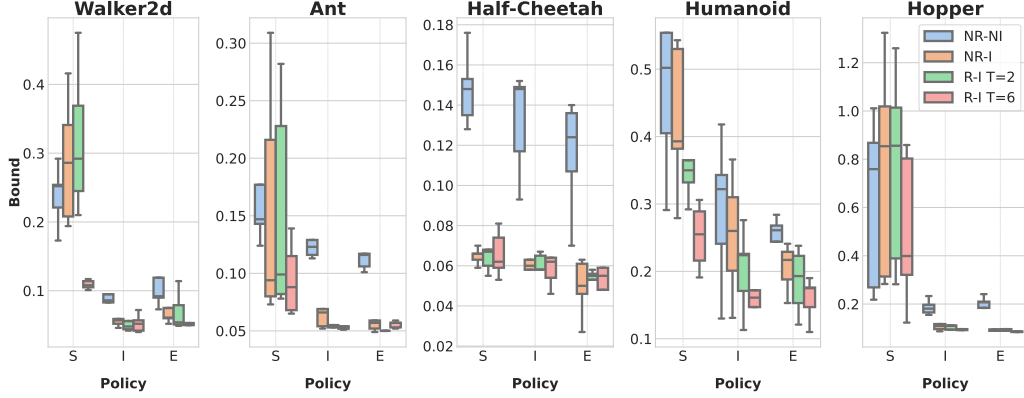

Figure 3: *Bound values*. Normalized bound values for all baselines across five MuJoCo environments over three policy qualities. Results are aggregated over all policy instances and repetitions.

zero implies that the bound closely follows the actual returns. *Tightness*: The difference between the predicted bound and the actual test error; smaller values indicate more accurate estimates of the discounted return prediction error. *Correlation*: We expect a linear correlation between the risk certificates and the observed test errors across policy instances.

**Computational requirements.** We conduct our experiments on a single computer equipped with a GeForce RTX 4090 GPU, an Intel(R) Core(TM) i7-14700K CPU (5.6 GHz), and 96 GB of memory. Training five policy instances to convergence in each environment takes about 30 minutes per instance, totaling 150 minutes. Collecting validation and test episodes requires around 20 minutes per policy level, or 60 minutes in total. Model training and PAC-Bayes bound computation across five policy instances, five repetitions, four baselines, and three policies takes four minutes per run, totaling roughly 1200 minutes per environment, 7000 minutes in total (about five days).

## 4.2 Results

We present full results on every environment, policy instance and repetition in Appendix D and restrict ourselves to discussing aggregated results in the main text.

**Strong correlation between bounds and test errors.** In Figure 2, we present scatter plots of all the PAC-Bayes bounds discussed in 4.1, policy instances, and repetitions against their respective test set errors across environments and levels of policy expertise. For every bound, the correlation between the bound and the test error increases with policy expertise. Within a fixed expertise level, the correlation also improves as the bound becomes more advanced, a trend that is already evident in more noisy *starter* policy. For example, in the brittle Hopper environment, which exhibits the weakest correlations overall, moving from NR-NI to R-I with  $T=6$  raises the Pearson correlation from 0.4 to 0.65. At higher expertise levels, our recursive bounds achieve correlations above 0.9 in almost all environments. Overall we see a clear linear trend, which demonstrates that our bounds are tight. There appears an increasing scatter as the expertise level decreases. This is expected, as the effects of an unconverged policy function on environment dynamics are less predictable. The bounds therefore provide a good prediction of the test-time return, answering Q1.

**Tightness improves with recursive depth.** In Figure 3 we plot the normalized bounds aggregated over policy instances and repetitions for each of the five environments. Smaller values reflect tighter bounds. Data-informed priors improve bounds across all environments for intermediate and expert policies, though this effect is less clear for the starter level policy. Introducing recursion (R-I, with  $T=2$  and  $T=6$ ) further tightens bounds, with deeper recursion generally yielding the tightest results. These improvements are most evident in environments with brittle dynamics such as Humanoid and Hopper where the locomotor has to keep its balance and less so in simpler environments such as Half-Cheetah. We see that while the correlation between bound and test-set error is already high, better, recursive, bounds provide improved tightness guarantees answering Q2.

**Recursion improves sample efficiency.** Collecting validation data from physical robots is often costly. Hence, the sample efficiency of a risk-certificate generation pipeline is of particular interest.



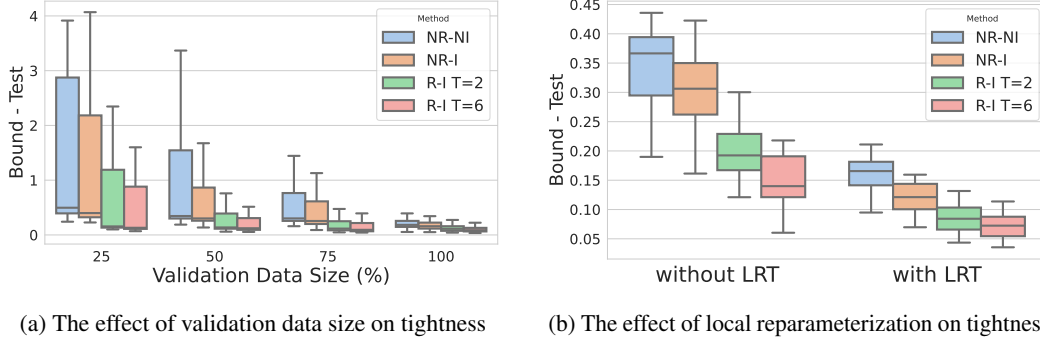

Figure 4: *Bound tightness; smaller is better. Results are provided for the Humanoid environment, using five policy instances and five repetitions. (a) Tightness scores aggregated across three policy qualities and various validation set sizes, expressed as percentages of the full validation dataset. (b) Effect of the local reparameterization trick on bound tightness, illustrated for the expert-level policy.*

Figure 4a shows the tightness scores of the bounds across different validation data sizes in the Humanoid environment, while keeping the test size fixed. As expected, larger validation sets lead to tighter bounds, but the effect is most pronounced for our proposed recursive bounds. R-I T=6 achieves tightness results comparable to those that the non-recursive bounds (non-informed, NR-NI, and data-informed, NR-I) attain with twice as many data points. These findings demonstrate the ability of recursive bounds to significantly improve sample efficiency, addressing Q3.

**Local reparameterization improves tightness.** To train our model, we use a Bayesian neural network (BNN) that represents uncertainty by learning distributions over neural network parameters. To our knowledge, prior work on PAC-Bayesian risk certificate building with BNNs has relied exclusively on Blundell et al. [2015]’s *Bayes by backprop* approach [see, e.g., Pérez-Ortiz et al., 2021]. We show with Figure 4b that using the *local reparameterization trick* (LRT) [Kingma et al., 2015] to compute the empirical risk term in the bound calculation greatly improves bound tightness of all four evaluated bounds. This effects holds even in the already saturated expert-level policy of the challenging Humanoid environment. Further details can be found in Appendix D.

## 5 Limitations, future work, and broader impact

We restricted our empirical investigation to a single actor-critic algorithm and a single physics engine. This was a conscious choice to facilitate interpretation and maintain feasibility. Given the brittleness of the MuJoCo locomotion environments, we do not expect meaningful additional information to come from extending the same pipeline to RL suites with a similar level of fidelity. The next major step forward would be to implement our pipeline on a physical platform under controlled conditions. We considered only dense-reward locomotion scenarios with rigid locomotors, as this is the natural first step. The applicability of our findings to more advanced control settings, such as sparse-reward scenarios that require goal-conditioned or hierarchical RL algorithm design is subject to further investigation. We leave this enterprise to future work as the deep learning-based solutions for such setups have not yet reached the level of maturity to move beyond simulations. Another significant leap would be to proceed from our current self-certified policy evaluation approach to self-certified policy optimization in an online setting. This would necessitate training the policy via a PAC-Bayes bound. However, RL is a feedback-loop system in which assuring convergence, numerical stability, and optimal trade-offs between exploration and exploitation are major determinants of a stable training. While promising preliminary results exist [Tasdighi et al., 2024a,b], the problem is fundamental and requires a dedicated research program—an effort that goes beyond the scope of a single paper.

Our work contributes to the trustworthy development of agentic AI technologies, thereby promoting their adoption by society. Public concerns about such technologies will be even more pronounced when they are deployed on physical systems that are in direct contact with humans. Thanks to reliable risk certificates, such safety-critical technologies are likely to receive wider adoption. This, in turn, will further accelerate their development by expanding the pool of practice and observations.

## References

- S. Agrawal and R. Jia. Optimistic posterior sampling for reinforcement learning: worst-case regret bounds. *Advances in Neural Information Processing Systems (NeurIPS)*, 2017.
- P. Alquier et al. User-friendly introduction to PAC-Bayes bounds. *Foundations and Trends in Machine Learning*, 2024.
- A. Ambroladze, E. Parrado-Hernandez, and J. Shawe-Taylor. Tighter PAC-Bayes bounds. In *Advances in Neural Information Processing Systems (NeurIPS)*, 2006.
- P. Auer and R. Ortner. Logarithmic online regret bounds for undiscounted reinforcement learning. *Advances in Neural Information Processing Systems (NeurIPS)*, 2006.
- P. Auer, T. Jaksch, and R. Ortner. Near-optimal regret bounds for reinforcement learning. *Advances in Neural Information Processing Systems (NeurIPS)*, 2008.
- M. G. Azar, I. Osband, and R. Munos. Minimax regret bounds for reinforcement learning. In *Proceedings of the International Conference on Machine Learning (ICML)*. PMLR, 2017.
- P. Ball, L. Smith, I. Kostrikov, and S. Levine. Efficient online reinforcement learning with offline data. In *Proceedings of the International Conference on Machine Learning (ICML)*, 2023.
- C. Blundell, J. Cornebise, K. Kavukcuoglu, and D. Wierstra. Weight uncertainty in neural network. In *Proceedings of the 32nd International Conference on Machine Learning*, 2015.
- G. Brockman. Openai gym. *arXiv preprint arXiv:1606.01540*, 2016.
- O. Catoni. PAC-Bayesian supervised classification: The thermodynamics of statistical learning. *Lecture Notes-Monograph Series*, 2007.
- X. Chen, C. Wang, Z. Zhou, and K. Ross. Randomized ensembled double q-learning: Learning fast without a model. *International Conference on Learning Representations (ICLR)*, 2021.
- P. F. Christiano, J. Leike, T. Brown, M. Martic, S. Legg, and D. Amodei. Deep reinforcement learning from human preferences. In *Advances in Neural Information Processing Systems (NeurIPS)*, 2017.
- C. Dann, T. Lattimore, and E. Brunskill. Unifying PAC and regret: Uniform PAC bounds for episodic reinforcement learning. *Advances in Neural Information Processing Systems (NeurIPS)*, 2017.
- DeepSeek-AI et al. Deepseek-v3 technical report, 2025. URL <https://arxiv.org/abs/2412.19437>.
- G. Dziugaite and D. Roy. Computing non-vacuous generalization bounds for deep (stochastic) neural networks with many more parameters than training data. In *Proceedings of the Conference on Uncertainty in Artificial Intelligence (UAI)*, 2017.
- G. Dziugaite and D. Roy. Data-dependent PAC-Bayes priors via differential privacy. In *Advances in Neural Information Processing Systems (NeurIPS)*, 2018.
- G. K. Dziugaite, K. Hsu, W. Gharbieh, G. Arpino, and D. Roy. On the role of data in PAC-Bayes bounds. In *Proceedings on the International Conference on Artificial Intelligence and Statistics (AISTATS)*, 2021.
- M. Fard, J. Pineau, and C. Szepesvári. PAC-Bayesian policy evaluation for reinforcement learning. In *Proceedings on the International Conference on Artificial Intelligence and Statistics (AISTATS)*, 2012.
- A. Foong, W. Bruinsma, D. Burt, and R. Turner. How tight can PAC-Bayes be in the small data regime? *Advances in Neural Information Processing Systems (NeurIPS)*, 34:4093–4105, 2021.
- A. Y. Foong, W. P. Bruinsma, and D. R. Burt. A note on the chernoff bound for random variables in the unit interval. *arXiv preprint arXiv:2205.07880*, 2022.
- S. Fujimoto, H. Hoof, and D. Meger. Addressing function approximation error in actor-critic methods. In *Proceedings of the International Conference on Machine Learning (ICML)*, 2018.

390 P. Germain, F. Bach, A. Lacoste, and S. Lacoste-Julien. PAC-Bayesian theory meets Bayesian  
391 inference. In *Advances in Neural Information Processing Systems (NeurIPS)*, 2016.

392 T. Haarnoja, A. Zhou, P. Abbeel, and S. Levine. Soft Actor-Critic: Off-policy maximum entropy deep  
393 reinforcement learning with a stochastic actor. In *Proceedings of the International Conference on  
394 Machine Learning (ICML)*, 2018a.

395 T. Haarnoja, A. Zhou, K. Hartikainen, G. Tucker, S. Ha, J. Tan, V. Kumar, H. Zhu, A. Gupta,  
396 P. Abbeel, et al. Soft actor-critic algorithms and applications. *arXiv preprint arXiv:1812.05905*,  
397 2018b.

398 D. Hafner, J. Pasukonis, J. Ba, and T. Lillicrap. Mastering diverse control tasks through world models.  
399 *Nature*, 2025.

400 K.-C. Hsu, A. Z. Ren, D. P. Nguyen, A. Majumdar, and J. F. Fisac. Sim-to-lab-to-real: Safe  
401 reinforcement learning with shielding and generalization guarantees. *Artificial Intelligence*, 2022.

402 N. Jiang. PAC reinforcement learning with an imperfect model. In *Proceedings of the AAAI  
403 Conference on Artificial Intelligence*, volume 32, 2018.

404 D. Kingma and J. Ba. Adam: A method for stochastic optimization. In *International Conference on  
405 Learning Representations (ICLR)*, 2015.

406 D. P. Kingma, T. Salimans, and M. Welling. Variational dropout and the local reparameterization  
407 trick. *Advances in Neural Information Processing Systems (NeurIPS)*, 28, 2015.

408 I. Kostrikov, L. M. Smith, and S. Levine. Demonstrating a walk in the park: Learning to walk in 20  
409 minutes with model-free reinforcement learning. In *Robotics: Science and Systems*, 2023.

410 A. Krishnamurthy, A. Agarwal, and J. Langford. PAC reinforcement learning with rich observations.  
411 *Advances in Neural Information Processing Systems (NeurIPS)*, 29, 2016.

412 J. Langford. Tutorial on practical prediction theory for classification. *Journal of Machine Learning  
413 Research (JMLR)*, 6(3), 2005.

414 T. Lillicrap, J. Hunt, A. Pritzel, N. Heess, T. Erez, Y. Tassa, D. Silver, and D. Wierstra. Continuous  
415 control with deep reinforcement learning. In *International Conference on Learning Representations  
416 (ICLR)*, 2016.

417 S. Lotfi, M. Finzi, S. Kapoor, A. Potapczynski, M. Goldblum, and A. G. Wilson. PAC-Bayes com-  
418 pression bounds so tight that they can explain generalization. In *Advances in Neural Information  
419 Processing Systems (NeurIPS)*, 2022.

420 A. Maurer. A note on the PAC bayesian theorem. *arXiv preprint cs/0411099*, 2004.

421 S. D. Mbacke, F. Clerc, and P. Germain. PAC-Bayesian generalization bounds for adversarial  
422 generative models. In *Proceedings of the 40th International Conference on Machine Learning*,  
423 2023a.

424 S. D. Mbacke, F. Clerc, and P. Germain. Statistical guarantees for variational autoencoders using  
425 PAC-Bayesian theory. In *Advances in Neural Information Processing Systems (NeurIPS)*, 2023b.

426 D. McAllester. PAC-Bayesian model averaging. In *Proceedings of the Conference on Learning  
427 Theory (COLT)*, 1999.

428 D. A. McAllester. Some PAC-Bayesian theorems. In *Proceedings of the eleventh annual conference  
429 on Computational learning theory*, pages 230–234, 1998.

430 Z. Mhammedi, P. Grünwald, and B. Guedj. PAC-Bayes un-expected bernstein inequality. *Advances  
431 in Neural Information Processing Systems (NeurIPS)*, 32, 2019.

432 K. Nozawa, P. Germain, and B. Guedj. PAC-Bayesian contrastive unsupervised representation  
433 learning. In *Proceedings of the Conference on Uncertainty in Artificial Intelligence (UAI)*, 2020.

434 I. Osband, D. Russo, and B. Van Roy. (more) efficient reinforcement learning via posterior sampling.  
435 *Advances in Neural Information Processing Systems (NeurIPS)*, 2013.

436 A. Paszke, S. Gross, F. Massa, A. Lerer, J. Bradbury, G. Chanan, T. Killeen, Z. Lin, N. Gimelshein,  
437 L. Antiga, A. Desmaison, A. Kopf, E. Yang, Z. DeVito, M. Raison, A. Tejani, S. Chilamkurthy,  
438 B. Steiner, L. Fang, J. Bai, and S. Chintala. PyTorch: An Imperative Style, High-Performance  
439 Deep Learning Library. *Advances in Neural Information Processing Systems (NeurIPS)*, 2019.

440 M. Pérez-Ortiz, O. Rivasplata, J. Shawe-Taylor, and C. Szepesvári. Tighter risk certificates for neural  
441 networks. *Journal of Machine Learning Research (JMLR)*, 2021.

442 M. Puterman. *Markov decision processes: discrete stochastic dynamic programming*. John Wiley &  
443 Sons, 2014.

444 D. Reeb, A. Doerr, S. Gerwinn, and B. Rakitsch. Learning Gaussian processes by minimizing PAC-  
445 Bayesian generalization bounds. *Advances in Neural Information Processing Systems (NeurIPS)*,  
446 2018.

447 O. Rivasplata, V. M. Tankasali, and C. Szepesvari. PAC-Bayes with backprop. *arXiv preprint*  
448 *arXiv:1908.07380*, 2019.

449 M. Seeger. PAC-Bayesian generalisation error bounds for Gaussian process classification. *Journal of*  
450 *Machine Learning Research (JMLR)*, 2002.

451 W. Shang, K. Sohn, D. Almeida, and H. Lee. Understanding and improving convolutional neural  
452 networks via concatenated rectified linear units. In *Proceedings of the International Conference on*  
453 *Machine Learning (ICML)*, 2016.

454 J. Shawe-Taylor and R. Williamson. A PAC analysis of Bayesian estimator. In *Proceedings of the*  
455 *Conference on Learning Theory (COLT)*, 1997.

456 A. Strehl, L. Li, E. Wiewiora, J. Langford, and M. Littman. PAC model-free reinforcement learning.  
457 In *Proceedings of the International Conference on Machine Learning (ICML)*, 2006.

458 A. L. Strehl, L. Li, and M. L. Littman. Reinforcement learning in finite mdps: PAC analysis. *Journal*  
459 *of Machine Learning Research (JMLR)*, 2009.

460 R. Sutton and A. Barto. *Reinforcement learning: An introduction*. MIT Press, 2018.

461 B. Tasdighi, A. Akgül, M. Haussmann, K. K. Brink, and M. Kandemir. PAC-Bayesian soft actor-critic  
462 learning. In *Advances in Approximate Bayesian Inference (AABI)*, 2024a.

463 B. Tasdighi, M. Haussmann, N. Werge, Y.-S. Wu, and M. Kandemir. Deep exploration with PAC-  
464 Bayes. *arXiv preprint arXiv:2402.03055*, 2024b.

465 N. Thiemann, C. Igel, O. Wintenberger, and Y. Seldin. A strongly quasiconvex PAC-Bayesian bound.  
466 In *International Conference on Algorithmic Learning Theory*, pages 466–492. PMLR, 2017.

467 D. Tiapkin, D. Belomestny, D. Calandriello, É. Moulines, R. Munos, A. Naumov, M. Rowland,  
468 M. Valko, and P. Ménard. Optimistic posterior sampling for reinforcement learning with few  
469 samples and tight guarantees. *Advances in Neural Information Processing Systems (NeurIPS)*,  
470 2022a.

471 D. Tiapkin, D. Belomestny, E. Moulines, A. Naumov, S. Samsonov, Y. Tang, M. Valko, and P. Ménard.  
472 From dirichlet to rubin: Optimistic exploration in rl without bonuses. In *Proceedings of the*  
473 *International Conference on Machine Learning (ICML)*. PMLR, 2022b.

474 E. Todorov, T. Erez, and Y. Tassa. Mujoco: A physics engine for model-based control. In *IEEE/RSJ*  
475 *International Conference on Intelligent Robots and Systems (IROS)*, 2012.

476 Y.-S. Wu and Y. Seldin. Split-kl and PAC-Bayes-split-kl inequalities for ternary random variables.  
477 *Advances in Neural Information Processing Systems (NeurIPS)*, 2022.

- 478 Y.-S. Wu, Y. Zhang, B.-E. Chérif-Abdellatif, and Y. Seldin. Recursive PAC-Bayes: A frequentist  
479 approach to sequential prior updates with no information loss. In *Advances in Neural Information*  
480 *Processing Systems (NeurIPS)*, 2024.
- 481 W. Zhang, G. Wang, J. Sun, Y. Yuan, and G. Huang. Storm: Efficient stochastic transformer based  
482 world models for reinforcement learning. In *Advances in Neural Information Processing Systems*  
483 *(NeurIPS)*, 2023.
- 484 D. M. Ziegler, N. Stiennon, J. Wu, T. B. Brown, A. Radford, D. Amodei, P. Christiano, and G. Irving.  
485 Fine-tuning language models from human preferences. 2019.



# APPENDIX

## A Related work

**Theoretical analysis of reinforcement learning.** Exploration in finite-horizon Markov decision processes has been addressed in several prior works. UCBVI [Azar et al., 2017] offers a simple approach based on optimism under uncertainty, combining computational efficiency with conceptual clarity for exploration in finite-horizon MDPs. BayesUCBVI [Tiapkin et al., 2022b] builds on this by introducing a tabular, stage-dependent, episodic reinforcement learning algorithm that uses a quantile of the posterior distribution of Q-values for optimism, eliminating the need for explicit bonus terms. However, it remains uncertain whether the PSRL [Osband et al., 2013] approach can achieve optimal problem-independent regret bounds. UCRL2 [Auer et al., 2008], an extension of UCRL [Auer and Ortner, 2006], employs upper confidence bounds (UCB) to guide policy selection, encouraging exploration of uncertain state-action pairs and reducing regret over time, resulting in a near-optimal regret bound that grows logarithmically with the number of episodes. Agrawal and Jia [2017] propose a PSRL-inspired algorithm for multi-armed bandits, using posterior sampling to incorporate uncertainty and to form an optimistic policy, achieving near-optimal regret bounds. However, it is unclear whether it can achieve the problem-independent lower bound. OPSRL [Tiapkin et al., 2022a] extends PSRL by using multiple posterior samples instead of a single one, providing a high-probability regret-bound guarantees and ensuring strong performance.

**PAC-Bayes analysis.** PAC-Bayesian analysis provides a frequentist framework for integrating prior knowledge into learning algorithms [Shawe-Taylor and Williamson, 1997, McAllester, 1998, Alquier et al., 2024]. These methods leverage priors that sustain high confidence during learning [McAllester, 1999, Seeger, 2002, Catoni, 2007, Thiemann et al., 2017, Rivasplata et al., 2019, Pérez-Ortiz et al., 2021], but the resulting confidence intervals rely on data excluded from prior formation, making prior data allocation a critical challenge. Strategies for crafting effective PAC-Bayesian priors address this limitation [Ambroladze et al., 2006, Dziugaite et al., 2021, Wu et al., 2024].

**PAC-Bayesian risk certificate.** In recent years, PAC-Bayesian methods have also been used to compress neural nets [Lotfi et al., 2022], and to provide risk certificates for both uninformed [Dziugaite and Roy, 2017] and data-informed priors [Dziugaite and Roy, 2018, Dziugaite et al., 2021, Pérez-Ortiz et al., 2021]. Reeb et al. [2018] introduce PAC-Bayesian bounds for Gaussian process-based regression, and an increasing body of literature now provides risk certificates for deep generative models, such as VAEs [Mbacke et al., 2023b], GANs [Mbacke et al., 2023a], and contrastive learning frameworks [Nozawa et al., 2020], among others. Hsu et al. [2022] used PAC-Bayes to provide realistic safety guarantees, focusing primarily on worst-risk and out-of-distribution safety.

**PAC-Bayesian RL.** PAC analysis in RL has led to algorithms that provide formal guarantees on sample complexity and performance. Strehl et al. [2006] introduced Delayed Q-learning, an efficient model-free RL method. Strehl et al. [2009] established PAC bounds for both model-free and model-based methods in finite MDPs, highlighting sample efficiency. For complex observation spaces, Krishnamurthy et al. [2016] proposed Least Squares Value Elimination, extending contextual bandit frameworks to sequential settings with PAC guarantees. In model-based RL, Dann et al. [2017] introduced the Uniform-PAC framework for finite-state episodic MDPs, achieving optimal sample complexity and regret bounds. Jiang [2018] improved model-based efficiency with a polynomial-complexity algorithm. PAC-Bayesian frameworks have also been applied in RL for policy evaluation and stability. Fard et al. [2012] introduced a PAC-Bayesian method for policy evaluation with probabilistic guarantees which was subsequently extended to soft actor-critic approaches [Tasdighi et al., 2024a] and deep exploration with sparse rewards [Tasdighi et al., 2024b]. Despite these advancements, the tightness, i.e., the quality, of the risk certificates remained an open question.

## 533 B Algorithms

534 In this section, we present two pseudocodes. Algorithm 1 illustrates the overall pipeline of our  
 535 method, capturing the main components from policy training to PAC-Bayes bound calculation.

536 Algorithm 2 indicates the Recursive PAC-Bayes framework in detail, which outlines the step-by-  
 537 step calculation of recursive bound across different splits of the training data, ultimately leading  
 538 to the final bound. This framework supports multiple levels of recursion (e.g., two or six levels in  
 539 our experiments). Details on the size of each data split and the selection strategy are provided in  
 540 Appendix C.

---

### Algorithm 1 Predicting Policy Return via PAC-Bayes Bound Fitting

---

- 1: **Input:** Environment, Actor-Critic algorithm, BNN architecture, PAC-Bayes bounds
- 2: **Output:** Predicted test-time discounted returns and PAC-Bayes generalization bounds

#### **Policy Training**

- 3: Train policy  $\pi$  using REDQ Actor-Critic algorithm
- 4: Save policy parameters after specific training steps

#### **Data Collection**

- 5: Disable further learning
- 6: Run saved policy for few roll-outs and collect data
- 7: Split data into training and test sets

#### **Bayesian Model Training**

- 8: Initialize Bayesian Neural Network (BNN)
- 9: Train Bayesian model on training data using PAC-Bayes-inspired loss as training objective

#### **Bound Construction and Evaluation**

- 10: **for** each bound type  $\in \{\text{NR-NI}, \text{NR-I}, \text{R-I T=2}, \text{R-I T=6}\}$  **do**
  - 11:   Specify prior and posterior distributions
  - 12:   Compute PAC-Bayes bound using model predicted outputs
  - 13: **end for**
  - 14: **Return:** Model predictions on test data and bound evaluations with train data
-

---

**Algorithm 2** Recursive PAC-Bayes bound loss computation

---

- 1: **Input:** Training dataset split  $\mathcal{D} = S_1 \cup \dots \cup S_T$  with total size  $N = |\mathcal{D}|$ , where  $N_t = |S_{\geq t}|$ ; scaling factors  $\kappa_1, \dots, \kappa_T$ ; posterior parameters  $\{\rho_1, \dots, \rho_T\}$ ; and fixed confidence levels  $\delta, \delta'$ .  
2: Calculate the loss for first portion:  $\hat{L}(h) \in [0, B]$

$$\mathbb{E}_{\rho_1}[\hat{L}^+(h)] \leq \text{kl}^{-1,+} \left( \frac{1}{N_t} \sum \left( \max \left\{ 0, \hat{L}(h) - \mu \right\} \right), \frac{\ln(T/\delta')}{N_t} \right)$$

- 3: Specify the first portion of recursive bound:

$$\mathcal{B}_1(\rho_1) = B \text{kl}^{-1,+} \left( \frac{\mathbb{E}_{\rho_1}[\hat{L}^+(h)]}{B}, \frac{\text{KL}(\rho_1 \parallel \rho_0^*) + \ln(2T\sqrt{N}/\delta)}{N} \right),$$

- 4: **for** each of the portions from  $t = 2$  to **End**: **do**

- 5:   Calculate the excess loss:

$$L_t^{\text{exc}}(h) = L(h) - \kappa_t \mathbb{E}_{\rho_{t-1}}[L(h')] \in [-\kappa_t B, B]$$

we have:

$$\mathbb{E}_{\rho_t}[\hat{L}_t^{\text{exc}+}(h)] \leq \text{kl}^{-1,+} \left( \frac{1}{N_t} \sum \left( \max \left\{ 0, \hat{L}_t^{\text{exc}}(h) - \mu \right\} \right), \frac{\ln(2T/\delta')}{N_t} \right)$$

$$\mathbb{E}_{\rho_t}[\hat{L}_t^{\text{exc}-}(h)] \leq \text{kl}^{-1,-} \left( \frac{1}{N_t} \sum \left( \max \left\{ 0, \mu - \hat{L}_t^{\text{exc}}(h) \right\} \right), \frac{\ln(2T/\delta')}{N_t} \right)$$

- 6:   calculate  $\mathcal{E}_t(\rho_t)$  :

$$\begin{aligned} \mathcal{E}_t(\rho_t) &= \mu + (B - \mu) \text{kl}^{-1,+} \left( \frac{\mathbb{E}_{\rho_t}[\hat{L}_t^{\text{exc}+}(h)]}{B - \mu}, \frac{\text{KL}(\rho_t \parallel \rho_{t-1}^*) + \ln(4T\sqrt{N_t}/\delta)}{N_t} \right) \\ &\quad - (\mu + \kappa_t B) \text{kl}^{-1,-} \left( \frac{\mathbb{E}_{\rho_t}[\hat{L}_t^{\text{exc}-}(h)]}{\mu + \kappa_t B}, \frac{\text{KL}(\rho_t \parallel \rho_{t-1}^*) + \ln(4T\sqrt{N_t}/\delta)}{N_t} \right), \end{aligned}$$

- 7:   Update the whole bound iteratively:

$$\mathcal{B}_t(\rho_t) = \mathcal{E}_t(\rho_t, \kappa_t) + \kappa_t \mathcal{B}_{t-1}(\rho_{t-1}^*),$$

- 8:    $t = t + 1$

- 9: **end for**

- 10: With probability higher than  $1 - \delta$ :

$$\mathbb{E}_{\rho_t}[L(h)] \leq \mathcal{B}_t(\rho_t)$$

---

## C Experimental Details

In this section, we provide the details and design choices for our environments, dataset, model training and how to replicate our experimental results. We consider five environments from version ‘v4’ of MuJoCo suite environments [Todorov et al., 2012]. All implementations in this work utilize the PyTorch framework [Brockman, 2016] version ‘2.5.1’ and the OpenAI Gym environment [Paszke et al., 2019] with version ‘0.29.0’.

To assess the effectiveness of our proposed approach, we consider five popular locomotor tasks with complex state and action dimensionalities: Ant, Half-cheetah, Hopper, Walker2d, Humanoid.

### C.1 Specific hyperparameters

For recursive PAC-Bayes we use  $\kappa_t = 1/2$  for all  $t$ , and study the impact of recursion for data split over different portions. In our experiments we use  $\delta$  equal to 0.025 following Wu et al. [2024]’s implementation <https://github.com/pyijiezhang/rpb>.

In addition to the main confidence parameter  $\delta$  that controls the overall probability with which the PAC-Bayes bound holds, we introduce an auxiliary confidence parameter  $\delta'$ , following the approach of Wu et al. [2024]. This parameter accounts for the approximation error introduced when estimating expected values of empirical loss and empirical excess loss via sampling [Pérez-Ortiz et al., 2021], since these quantities lack closed-form expressions in our setting. Specifically,  $\delta'$  ensures that these sample-based estimates are accurate with high probability. We set  $\delta' = 0.01$ , consistent with the choice in the referenced work, and apply a union bound to combine the confidence levels. As a result, the overall bound holds with probability at least  $1 - \delta - \delta'$ , covering both the generalization guarantee and the estimation accuracy. This consideration is applied only during the evaluation phase for estimating the bounds, and not the optimization process.

## C.2 Constructing validation and test datasets

Our methodology consists of two main phases: *training* and *evaluation*. To collect the transition data required for constructing validation and test datasets, we train a generic reinforcement learning agent, REDQ—a powerful off-policy actor-critic method [Chen et al., 2021]. The REDQ agent uses an ensemble of ten critic networks and a single actor network. We use a replay ratio of one and perform one gradient update per environment step. At each Bellman target computation, two critics are randomly sampled from the ensemble for min-clipping, following the original work.

Training is conducted for 300 000 environment steps, after which we save the resulting policy as the *expert policy*. We also snapshot the policy at 100 000 and 200 000 steps, referring to them as the *starter* and *intermediate* level policies, respectively, to enable analysis across varying levels of agent proficiency.

In the evaluation phase, we disable the learning process and run the agent with exploration turned off and no policy updates performed. Using the frozen policy (at each of the three expertise levels), we collect 100 episodes of state transitions and rewards to construct a validation dataset for fitting the PAC-Bayes bound. An additional 100 episodes are collected under the same conditions to form our test dataset. This test data is used to compute a proxy for the generalization performance by evaluating the predicted discounted returns of the frozen policy on previously unseen trajectories.

## C.3 Neural network architectures

**REDQ agent training.** We use an ensemble of ten critic networks along with a single actor network. Each neural network consists of three layers, with layer normalization after each layer to regularize the network, following the approach of Ball et al. [2023]. Additionally, we use the concatenated ReLU activation function [Shang et al., 2016] which combines the positive and negative parts of two ReLU activations and concatenates them. This leads to richer feature representations and enables the learning of more complex patterns.

During training, we employ 10 000 warm-up steps without policy updates where the agent only interacts with the environment, during the evaluation phase we don’t have any warm-up steps. We use a replay ratio (RR) of one in both training and evaluation phase, which provides training stability and sample efficiency. We employ the Huber loss in the critic to measure the discrepancy between predicted Q-values and target Q-values as it consistently provides performance advantages across various baselines. Furthermore, the temperature parameter  $\alpha$  is automatically tuned during training to regulate policy entropy, balancing exploration and exploitation, following the method introduced by Haarnoja et al. [2018b].

All these architectural and training choices were empirically found to improve the model’s overall performance. Table 1 summarizes the hyperparameter and network configurations used in our experiments.

**Bayesian model training.** We aim to predict the test-time discounted return of a policy  $\pi$  by fitting a PAC-Bayes generalization bound using training data. To this end, we use a Bayesian neural network (BNN), which allows us to capture model uncertainty and compute valid generalization guarantees.

The BNN is a feedforward neural network with two hidden layers and one output layer. Each layer is implemented as a Variational Bayesian Linear layer, where weights are modeled as independent Gaussian distributions with learnable means and variances. ReLU activations are used between layers to introduce non-linearity.

During training, we apply the local reparameterization trick [Kingma et al., 2015], which samples the layer outputs rather than the weights. This reduces the variance of the gradient estimates, improves training stability, and reduces computational cost.

We train the BNN using a PAC-Bayes-inspired objective based on McAllester’s bound [McAllester, 1998], which balances empirical loss and a KL divergence term. The KL term acts as a regularizer that penalizes deviation from a prior distribution, effectively controlling model complexity. This enables us to compute reliable generalization bounds and estimate the expected test-time return of the policy. Architectural details are summarized in Table 1.

#### C.4 Baselines details

We evaluate two non-recursive (NR) baselines and two recursive (R) variants with different levels of depth. For the uninformed baseline (NR-NI), we use a PAC-Bayes-kl inverse bound where the prior is initialized without training data dependency. The posterior is learned using the entire training dataset, and the bound is also evaluated on this full dataset.

For the informed case (NR-I), we split the training dataset in half: the first half is used to learn a data-informed prior, and the second half is used to learn the posterior, both steps minimizing a PAC-Bayes bound. The bound is evaluated using the same subset used to learn the posterior.

In the recursive settings, we apply these splits iteratively. For example, with recursion depth two, we divide the data in two 50, 50 splits. For the deeper recursion with six steps, we split the training set into increasingly smaller partitions based on the number of episodes (3, 4, 6, 12, 25, 50). This allows us to allocate fewer data points for prior learning early on while reserving more for later refinement, enabling progressively more targeted fine-tuning.

Like Wu et al. [2024] we apply a relaxation of the PAC-Bayes-kl bound in our experiments by optimizing using the MCAllester bound [McAllester, 1998] while the bound evaluation is done using the split kl-based bound. In all approaches, we utilize a set of factorized Gaussian distributions to represent the priors and posteriors associated with every trainable parameter within the classifiers. These distributions take the form  $\pi = \mathcal{N}(w, \sigma I)$ , where  $w \in \mathbb{R}^d$  is the mean vector, and  $\sigma$  denotes the scalar variance parameter. To start, an uninformed prior  $\pi_0 = \mathcal{N}(w_0, \sigma_0 I)$  is employed, which does not depend on the training data. Here, the mean parameter is randomly initialized using Kaiming uniform initialization, while the log-variance parameter is initialized to a fixed value of (-4.6). We train all models using the hyperparameters provided in Table 1, specified with header ‘PAC-Bayes bound fitting’.

## D Results

The main results for all five MuJoCo environments are provided below. We considered three level of policy quality and five policy instances per environment. The scores represent the normalized bound and loss values with respect to the maximum discounted return for each environment, where the results are aggregated over five repetitions. Normalization applied using the maximum observed discounted return over all policy instances. Table 2 to Table 16 summarize the normalized bound values along with train and test error, across various environment and policy qualities.

**Mitigate Sample Correlation.** To reduce overfitting caused by high correlation among consecutive samples—where states are very similar and their associated target values nearly identical—we apply a thinning strategy. This strategy selectively samples fewer data points to break the correlation. Specifically, in environments like Ant and Half-Cheetah, which tend to produce longer episodes, we retain every fifth sample. In contrast, for environments with shorter episodes such as Humanoid, Hopper, and Walker2d, we keep every third sample. This approach reduces redundancy while ensuring that the dataset still contains sufficient information for training.

**Tightness of the bounds.** Figure 5 shows the tightness of all baselines, measured as the difference between the normalized bound score and the normalized test error. Values are aggregated across policy instances and repetitions for each of the five environments, with smaller values indicating tighter bounds. Box plots display the distribution of these differences: the box covers the interquartile range (25th to 75th percentile), the median is marked inside, and whiskers extend to points within 1.5



Table 1: *Hyper-parameters used in our experiments.* This includes both hyperparameters applied Actor-Critic setup in agent training and Bayesian model training for PAC-Bayes bound fitting.

|                                                       |                                              |          |
|-------------------------------------------------------|----------------------------------------------|----------|
| <b>Agent training:</b>                                |                                              |          |
| Evaluation episodes (evaluation mode)                 |                                              | 1        |
| Evaluation frequency (evaluation mode)                |                                              | 1        |
| Evaluation episodes (training mode)                   |                                              | -        |
| Evaluation frequency (training mode)                  |                                              | -        |
| Discount factor ( $\gamma$ )                          |                                              | 0.99     |
| $n$ -step returns                                     |                                              | 1 step   |
| Replay ratio                                          |                                              | 1        |
| Number of critic networks                             |                                              | 10       |
| Replay buffer size                                    |                                              | 100,000  |
| Maximum timesteps*                                    |                                              | 300,000  |
| Number of hidden layers for all networks              |                                              | 2        |
| Number of hidden units per layer                      |                                              | 256      |
| Nonlinearity                                          |                                              | CReLU    |
| Mini-batch size                                       |                                              | 256      |
| Network regularization method                         | Layer Normalization (LN) [Ball et al., 2023] |          |
| Actor/critic optimizer                                | Adam [Kingma and Ba, 2015]                   |          |
| Optimizer learning rates ( $\eta_\phi, \eta_\theta$ ) |                                              | 3e-4     |
| Polyak averaging parameter ( $\tau$ )                 |                                              | 5e-3     |
| <b>PAC-Bayes bound fitting:</b>                       |                                              |          |
| Number of hidden layers                               |                                              | 2        |
| Number of hidden units per layer                      |                                              | 256      |
| Nonlinearity                                          |                                              | ReLU     |
| Network regularization method                         | Layer Normalization (LN) [Ball et al., 2023] |          |
| BNN optimizer                                         | Adam [Kingma and Ba, 2015]                   |          |
| Optimizer learning rate                               |                                              | 2e-2     |
| Gradient Clipping Type                                |                                              | max-norm |
| Gradient Clipping Threshold                           |                                              | 1        |
| Learning rate scheduler                               |                                              | StepLR   |
| Learning rate decay factor                            |                                              | 0.5      |
| scheduler step size (epochs)                          |                                              | 10       |

times the interquartile range, illustrating typical variability. Outliers beyond this range are omitted for clarity. This effectively captures both the central tendency and the spread of the data across policies and methods. The plot reveals that using data-informed priors generally leads to tighter bounds, although this effect is less pronounced at the Starter level. Moreover, applying recursion and increasing its depth further tightens the bounds. The improvements from recursion are more noticeable in challenging environments and less so in simpler tasks.

**Validation data size.** Figure 6 examines the Pearson correlation between normalized bound scores and normalized test errors across policy levels and varying validation data sizes for the Humanoid environment—our most challenging setting due to its high-dimensional state and action spaces. Each heatmap displays a point estimate of these correlations for all baselines across different validation set sizes for specific policy aggregated over policy instances and repetitions. Although correlations are generally weaker and more variable under the Starter policy, for intermediate and expert level policies they tend to improve with stronger policies and larger validation sets. Recursive bounds, especially those with greater recursion depth, consistently show stronger positive correlations. These findings emphasize that both policy strength and validation data size affect the bound’s ability to predict generalization, with recursion providing the most reliable alignment between bounds and test errors.

**Effect of Local reparameterization trick** We incorporate the Local Reparameterization Trick (LRT) into our variational Bayesian neural network architecture, where it has not been used in previous

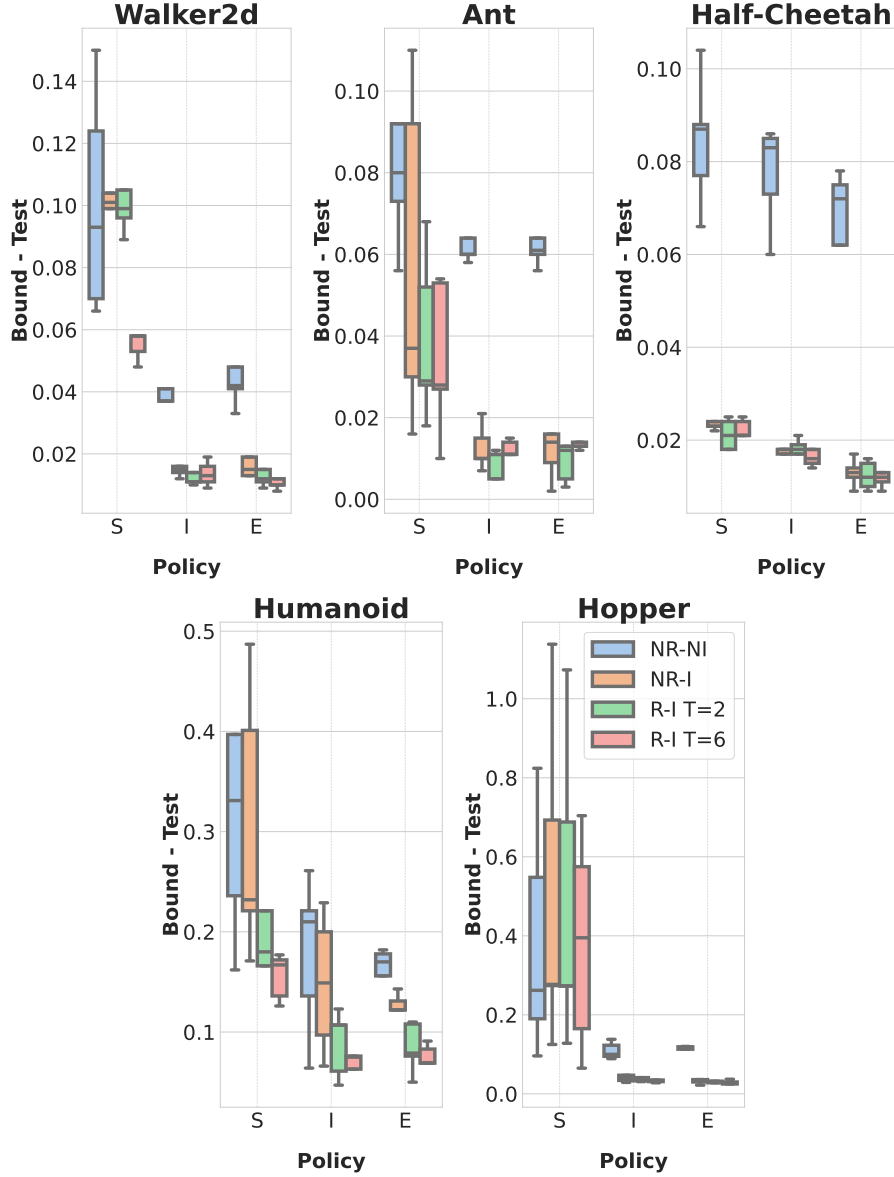

Figure 5: *(Bound - test) values*. Tightness of the bound over all baselines and policy levels considered for five MuJoCo environments, the plots aggregated over policy instances and their repetitions.

674 Bayesian approaches for reinforcement learning to our knowledge. Unlike standard sampling methods  
 675 that draw one set of weights per layer and propagate forward, LRT enables sampling at the level of  
 676 individual pre-activations, significantly reducing the variance of gradient estimates during training.  
 677 This leads to more stable optimization and improved posterior quality. To evaluate its impact, we  
 678 compare the tightness of all our baselines on the Humanoid environment for two versions of our model,  
 679 with and without LRT. As shown in Figure 4b, applying LRT consistently results in tighter bounds.  
 680 Results are aggregated over five policy instances and five repetition each, while only the expert level  
 681 policy. In both cases the results are a clear improvement. These expert policy improvements suggest  
 682 improvements in other policy levels as well.

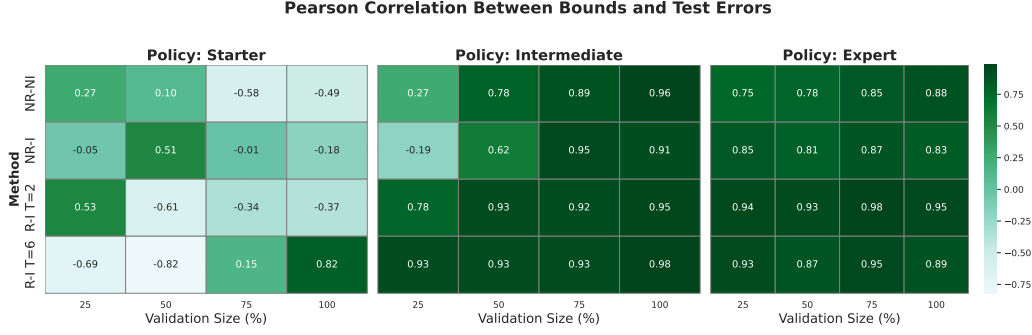

Figure 6: Pearson correlation between bound scores and test error considering five policy instances and five repetitions for each, across various validation sizes and policy levels.

Table 2: Normalized test error, train error and bound comparison for **Ant** considering **Starter** policy.

| Method  | E-SEED-01    |              |       |              | E-SEED-02    |              |       |              | E-SEED-03    |              |       |              | E-SEED-04    |              |       |              | E-SEED-05    |              |       |              |
|---------|--------------|--------------|-------|--------------|--------------|--------------|-------|--------------|--------------|--------------|-------|--------------|--------------|--------------|-------|--------------|--------------|--------------|-------|--------------|
|         | Train        | Test         | Bound | Last Portion | Train        | Test         | Bound | Last Portion | Train        | Test         | Bound | Last Portion | Train        | Test         | Bound | Last Portion | Train        | Test         | Bound | Last Portion |
| NR-NI   | 0.074        | 0.070        | 0.143 |              | 0.061        | 0.067        | 0.147 |              | 0.112        | 0.085        | 0.177 |              | 0.070        | 0.068        | 0.124 |              | 0.195        | 0.156        | 0.281 |              |
| NR-I    | 0.051        | 0.043        | 0.080 |              | 0.052        | 0.057        | 0.073 |              | 0.137        | 0.106        | 0.216 |              | 0.066        | 0.064        | 0.094 |              | 0.268        | 0.217        | 0.309 |              |
| R-I T=2 | 0.060        | 0.053        | 0.123 | 0.082        | 0.056        | 0.060        | 0.122 | 0.078        | 0.198        | 0.160        | 0.259 | 0.228        | 0.072        | 0.071        | 0.127 | 0.099        | 0.283        | 0.230        | 0.348 | 0.282        |
| R-I T=6 | <b>0.049</b> | <b>0.040</b> | 0.118 | <b>0.068</b> | <b>0.048</b> | <b>0.055</b> | 0.099 | <b>0.065</b> | <b>0.078</b> | <b>0.061</b> | 0.149 | <b>0.115</b> | <b>0.063</b> | <b>0.061</b> | 0.116 | <b>0.088</b> | <b>0.103</b> | <b>0.086</b> | 0.183 | <b>0.139</b> |

Table 3: Normalized test error, train error and bound comparison for **Ant** considering **Intermediate** policy.

| Method  | E-SEED-01    |              |       |              | E-SEED-02    |              |       |              | E-SEED-03    |              |       |              | E-SEED-04    |              |       |              | E-SEED-05    |              |       |              |
|---------|--------------|--------------|-------|--------------|--------------|--------------|-------|--------------|--------------|--------------|-------|--------------|--------------|--------------|-------|--------------|--------------|--------------|-------|--------------|
|         | Train        | Test         | Bound | Last Portion | Train        | Test         | Bound | Last Portion | Train        | Test         | Bound | Last Portion | Train        | Test         | Bound | Last Portion | Train        | Test         | Bound | Last Portion |
| NR-NI   | 0.057        | 0.055        | 0.129 |              | 0.070        | 0.089        | 0.149 |              | 0.046        | 0.056        | 0.116 |              | 0.046        | 0.049        | 0.113 |              | 0.055        | 0.065        | 0.123 |              |
| NR-I    | 0.041        | 0.043        | 0.057 |              | 0.046        | 0.050        | 0.059 |              | 0.051        | 0.059        | 0.069 |              | 0.036        | 0.042        | 0.052 |              | 0.038        | 0.047        | 0.054 |              |
| R-I T=2 | 0.044        | 0.042        | 0.093 | 0.053        | 0.065        | 0.081        | 0.138 | 0.092        | 0.043        | 0.050        | 0.093 | 0.055        | 0.038        | 0.043        | 0.093 | 0.055        | <b>0.034</b> | 0.044        | 0.087 | <b>0.049</b> |
| R-I T=6 | <b>0.039</b> | <b>0.038</b> | 0.068 | <b>0.052</b> | <b>0.046</b> | <b>0.049</b> | 0.080 | <b>0.064</b> | <b>0.039</b> | <b>0.041</b> | 0.068 | <b>0.052</b> | <b>0.035</b> | <b>0.040</b> | 0.074 | <b>0.051</b> | 0.041        | <b>0.043</b> | 0.070 | 0.054        |

Table 4: Normalized test error, train error and bound comparison for **Ant** considering **Expert** policy.

| Method  | E-SEED-01    |              |       |              | E-SEED-02    |              |       |              | E-SEED-03    |              |              |              | E-SEED-04    |              |       |              | E-SEED-05    |              |       |              |
|---------|--------------|--------------|-------|--------------|--------------|--------------|-------|--------------|--------------|--------------|--------------|--------------|--------------|--------------|-------|--------------|--------------|--------------|-------|--------------|
|         | Train        | Test         | Bound | Last Portion | Train        | Test         | Bound | Last Portion | Train        | Test         | Bound        | Last Portion | Train        | Test         | Bound | Last Portion | Train        | Test         | Bound | Last Portion |
| NR-NI   | 0.039        | 0.040        | 0.101 |              | 0.053        | 0.057        | 0.117 |              | 0.042        | 0.050        | 0.106        |              | 0.058        | 0.056        | 0.135 |              | 0.052        | 0.052        | 0.116 |              |
| NR-I    | 0.043        | 0.043        | 0.066 |              | 0.039        | 0.039        | 0.063 |              | <b>0.039</b> | 0.047        | <b>0.049</b> |              | <b>0.047</b> | 0.050        | 0.081 |              | <b>0.037</b> | <b>0.036</b> | 0.052 |              |
| R-I T=2 | <b>0.035</b> | <b>0.037</b> | 0.087 | <b>0.050</b> | <b>0.041</b> | 0.045        | 0.096 | <b>0.050</b> | <b>0.039</b> | 0.047        | 0.089        | 0.050        | 0.069        | 0.068        | 0.133 | 0.094        | 0.038        | 0.037        | 0.087 | <b>0.049</b> |
| R-I T=6 | 0.040        | 0.040        | 0.073 | 0.053        | 0.043        | <b>0.044</b> | 0.075 | 0.057        | 0.044        | <b>0.043</b> | 0.075        | 0.057        | <b>0.040</b> | <b>0.038</b> | 0.078 | <b>0.059</b> | 0.040        | 0.040        | 0.068 | 0.052        |

Table 5: Normalized test error, train error and bound comparison for **Half-cheetah** considering **Starter** policy.

| Method  | E-SEED-01    |              |              |              | E-SEED-02    |              |       |              | E-SEED-03    |              |       |              | E-SEED-04    |              |       |              | E-SEED-05    |              |       |              |
|---------|--------------|--------------|--------------|--------------|--------------|--------------|-------|--------------|--------------|--------------|-------|--------------|--------------|--------------|-------|--------------|--------------|--------------|-------|--------------|
|         | Train        | Test         | Bound        | Last Portion | Train        | Test         | Bound | Last Portion | Train        | Test         | Bound | Last Portion | Train        | Test         | Bound | Last Portion | Train        | Test         | Bound | Last Portion |
| NR-NI   | 0.071        | 0.072        | 0.176        |              | 0.058        | 0.058        | 0.135 |              | 0.062        | 0.062        | 0.128 |              | 0.066        | 0.065        | 0.153 |              | 0.060        | 0.061        | 0.148 |              |
| NR-I    | 0.043        | 0.043        | <b>0.066</b> |              | 0.039        | 0.039        | 0.063 |              | 0.037        | 0.037        | 0.059 |              | <b>0.047</b> | <b>0.047</b> | 0.070 |              | 0.042        | 0.042        | 0.066 |              |
| R-I T=2 | <b>0.042</b> | <b>0.042</b> | 0.126        | 0.067        | 0.044        | 0.044        | 0.106 | 0.068        | 0.037        | 0.037        | 0.094 | 0.055        | 0.051        | 0.050        | 0.133 | <b>0.068</b> | <b>0.039</b> | <b>0.039</b> | 0.108 | <b>0.060</b> |
| R-I T=6 | 0.056        | 0.057        | 0.116        | 0.081        | <b>0.037</b> | <b>0.038</b> | 0.086 | <b>0.059</b> | <b>0.032</b> | <b>0.032</b> | 0.064 | 0.046        | <b>0.040</b> | <b>0.038</b> | 0.106 | 0.074        | 0.041        | 0.041        | 0.100 | 0.062        |

Table 6: Normalized test error, train error and bound comparison for **Half-cheetah** considering **Intermediate** policy.

| Method  | E-SEED-01    |              |              |              | E-SEED-02    |              |       |              | E-SEED-03    |              |       |              | E-SEED-04    |              |       |              | E-SEED-05    |              |       |              |
|---------|--------------|--------------|--------------|--------------|--------------|--------------|-------|--------------|--------------|--------------|-------|--------------|--------------|--------------|-------|--------------|--------------|--------------|-------|--------------|
|         | Train        | Test         | Bound        | Last Portion | Train        | Test         | Bound | Last Portion | Train        | Test         | Bound | Last Portion | Train        | Test         | Bound | Last Portion | Train        | Test         | Bound | Last Portion |
| NR-NI   | 0.066        | 0.066        | 0.149        |              | 0.068        | 0.067        | 0.152 |              | 0.033        | 0.033        | 0.093 |              | 0.044        | 0.044        | 0.117 |              | 0.062        | 0.062        | 0.148 |              |
| NR-I    | <b>0.042</b> | <b>0.043</b> | <b>0.060</b> |              | 0.045        | 0.045        | 0.063 |              | 0.030        | 0.030        | 0.044 |              | 0.040        | 0.040        | 0.058 |              | <b>0.043</b> | <b>0.043</b> | 0.063 |              |
| R-I T=2 | 0.047        | 0.047        | 0.115        | 0.065        | <b>0.041</b> | <b>0.041</b> | 0.113 | <b>0.058</b> | <b>0.029</b> | <b>0.029</b> | 0.076 | <b>0.041</b> | <b>0.039</b> | <b>0.039</b> | 0.114 | 0.058        | 0.046        | 0.046        | 0.120 | 0.067        |
| R-I T=6 | 0.046        | 0.046        | 0.085        | 0.064        | 0.046        | 0.046        | 0.085 | 0.064        | 0.032        | 0.032        | 0.064 | 0.046        | <b>0.039</b> | <b>0.039</b> | 0.073 | <b>0.054</b> | 0.046        | 0.046        | 0.083 | 0.062        |

Table 7: Normalized test error, train error and bound comparison for **Half-cheetah** considering **Expert** policy.

| Method  | E-SEED-01    |              |              |              | E-SEED-02    |              |       |              | E-SEED-03    |              |              |              | E-SEED-04    |              |              |              | E-SEED-05    |              |       |              |
|---------|--------------|--------------|--------------|--------------|--------------|--------------|-------|--------------|--------------|--------------|--------------|--------------|--------------|--------------|--------------|--------------|--------------|--------------|-------|--------------|
|         | Train        | Test         | Bound        | Last Portion | Train        | Test         | Bound | Last Portion | Train        | Test         | Bound        | Last Portion | Train        | Test         | Bound        | Last Portion | Train        | Test         | Bound | Last Portion |
| NR-NI   | 0.045        | 0.045        | 0.107        |              | 0.050        | 0.052        | 0.124 |              | 0.029        | 0.029        | 0.070        |              | 0.063        | 0.058        | 0.136        |              | 0.061        | 0.065        | 0.140 |              |
| NR-I    | <b>0.033</b> | <b>0.033</b> | <b>0.046</b> |              | <b>0.043</b> | <b>0.046</b> | 0.063 |              | <b>0.018</b> | <b>0.018</b> | <b>0.027</b> |              | <b>0.041</b> | <b>0.036</b> | <b>0.050</b> |              | 0.045        | 0.049        | 0.061 |              |
| R-I T=2 | 0.040        | 0.040        | 0.093        | 0.056        | <b>0.043</b> | <b>0.046</b> | 0.102 | <b>0.058</b> | <b>0.018</b> | <b>0.018</b> | 0.050        | <b>0.027</b> | 0.044        | 0.038        | 0.096        | 0.053        | <b>0.041</b> | <b>0.045</b> | 0.098 | <b>0.055</b> |
| R-I T=6 | 0.037        | 0.037        | 0.064        | 0.048        | 0.045        | <b>0.046</b> | 0.076 | 0.059        | 0.021        | 0.021        | 0.040        | 0.030        | 0.042        | 0.042        | 0.071        | 0.055        | 0.046        | 0.047        | 0.078 | 0.059        |

Table 8: Normalized test error, train error and bound comparison for **Hopper** considering **Starter** policy.

| Method  | E-SEED-01    |              |       |              | E-SEED-02    |              |       |              | E-SEED-03    |              |              |              | E-SEED-04    |              |       |              | E-SEED-05    |              |       |              |
|---------|--------------|--------------|-------|--------------|--------------|--------------|-------|--------------|--------------|--------------|--------------|--------------|--------------|--------------|-------|--------------|--------------|--------------|-------|--------------|
|         | Train        | Test         | Bound | Last Portion | Train        | Test         | Bound | Last Portion | Train        | Test         | Bound        | Last Portion | Train        | Test         | Bound | Last Portion | Train        | Test         | Bound | Last Portion |
| NR-NI   | 0.567        | 0.569        | 0.759 |              | 0.341        | 0.320        | 0.868 |              | 0.007        | 0.007        | <b>0.269</b> |              | 0.201        | 0.187        | 1.011 |              | 0.122        | 0.122        | 0.218 |              |
| NR-I    | 0.575        | 0.577        | 0.854 |              | 0.347        | 0.326        | 1.019 |              | 0.009        | 0.009        | 0.283        |              | 0.200        | 0.186        | 1.324 |              | 0.189        | 0.189        | 0.314 |              |
| R-I T=2 | 0.580        | 0.583        | 0.909 | 0.856        | 0.346        | 0.326        | 1.593 | 1.014        | 0.009        | 0.009        | 0.896        | 0.282        | 0.200        | 0.187        | 1.570 | 1.260        | 0.261        | 0.261        | 0.398 | 0.389        |
| R-I T=6 | <b>0.156</b> | <b>0.156</b> | 0.528 | <b>0.321</b> | <b>0.243</b> | <b>0.228</b> | 2.148 | <b>0.803</b> | <b>0.004</b> | <b>0.004</b> | 1.629        | 0.399        | <b>0.166</b> | <b>0.155</b> | 2.850 | <b>0.859</b> | <b>0.058</b> | <b>0.058</b> | 0.215 | <b>0.123</b> |

Table 9: Normalized test error, train error and bound comparison for **Hopper** considering **intermediate** policy.

| Method  | E-SEED-01    |              |       |              | E-SEED-02    |              |       |              | E-SEED-03    |              |       |              | E-SEED-04    |              |       |              | E-SEED-05    |              |       |              |
|---------|--------------|--------------|-------|--------------|--------------|--------------|-------|--------------|--------------|--------------|-------|--------------|--------------|--------------|-------|--------------|--------------|--------------|-------|--------------|
|         | Train        | Test         | Bound | Last Portion | Train        | Test         | Bound | Last Portion | Train        | Test         | Bound | Last Portion | Train        | Test         | Bound | Last Portion | Train        | Test         | Bound | Last Portion |
| NR-NI   | 0.079        | 0.081        | 0.181 |              | 0.075        | 0.076        | 0.165 |              | 0.073        | 0.074        | 0.197 |              | 0.096        | 0.095        | 0.233 |              | 0.060        | 0.060        | 0.155 |              |
| NR-I    | 0.069        | 0.070        | 0.109 |              | 0.059        | 0.058        | 0.087 |              | 0.070        | 0.070        | 0.117 |              | 0.115        | 0.116        | 0.260 |              | 0.062        | 0.062        | 0.096 |              |
| R-I T=2 | 0.073        | 0.074        | 0.167 | 0.111        | 0.062        | 0.062        | 0.138 | 0.093        | 0.069        | 0.069        | 0.192 | 0.110        | 0.234        | 0.233        | 0.337 | 0.348        | 0.061        | 0.061        | 0.151 | 0.094        |
| R-I T=6 | <b>0.064</b> | <b>0.063</b> | 0.138 | <b>0.094</b> | <b>0.054</b> | <b>0.053</b> | 0.113 | <b>0.081</b> | <b>0.061</b> | <b>0.061</b> | 0.149 | <b>0.096</b> | <b>0.071</b> | <b>0.071</b> | 0.171 | <b>0.115</b> | <b>0.059</b> | <b>0.059</b> | 0.134 | <b>0.092</b> |

Table 10: Normalized test error, train error and bound comparison for **Hopper** considering **Expert** policy.

| Method  | E-SEED-01    |              |       |              | E-SEED-02    |              |       |              | E-SEED-03    |              |       |              | E-SEED-04    |              |       |              | E-SEED-05    |              |       |              |
|---------|--------------|--------------|-------|--------------|--------------|--------------|-------|--------------|--------------|--------------|-------|--------------|--------------|--------------|-------|--------------|--------------|--------------|-------|--------------|
|         | Train        | Test         | Bound | Last Portion | Train        | Test         | Bound | Last Portion | Train        | Test         | Bound | Last Portion | Train        | Test         | Bound | Last Portion | Train        | Test         | Bound | Last Portion |
| NR-NI   | 0.072        | 0.071        | 0.184 |              | 0.121        | 0.121        | 0.241 |              | 0.053        | 0.053        | 0.100 |              | 0.095        | 0.088        | 0.207 |              | 0.094        | 0.092        | 0.210 |              |
| NR-I    | 0.058        | 0.057        | 0.089 |              | <b>0.060</b> | <b>0.061</b> | 0.091 |              | 0.046        | 0.046        | 0.068 |              | 0.106        | 0.098        | 0.244 |              | 0.060        | 0.059        | 0.095 |              |
| R-I T=2 | 0.058        | 0.058        | 0.162 | 0.090        | 0.062        | 0.062        | 0.147 | 0.090        | 0.044        | 0.044        | 0.090 | 0.060        | 0.196        | 0.181        | 0.288 | 0.305        | 0.066        | 0.065        | 0.157 | 0.096        |
| R-I T=6 | <b>0.056</b> | <b>0.056</b> | 0.129 | <b>0.086</b> | 0.061        | <b>0.061</b> | 0.119 | <b>0.086</b> | <b>0.040</b> | <b>0.041</b> | 0.069 | <b>0.054</b> | <b>0.058</b> | <b>0.058</b> | 0.139 | <b>0.095</b> | <b>0.057</b> | <b>0.056</b> | 0.123 | <b>0.084</b> |

Table 11: Normalized test error, train error and bound comparison for **Humanoid** considering **Starter** policy.

| Method  | E-SEED-01    |              |       |              | E-SEED-02    |              |       |              | E-SEED-03    |              |       |              | E-SEED-04    |              |       |              | E-SEED-05    |              |       |              |
|---------|--------------|--------------|-------|--------------|--------------|--------------|-------|--------------|--------------|--------------|-------|--------------|--------------|--------------|-------|--------------|--------------|--------------|-------|--------------|
|         | Train        | Test         | Bound | Last Portion | Train        | Test         | Bound | Last Portion | Train        | Test         | Bound | Last Portion | Train        | Test         | Bound | Last Portion | Train        | Test         | Bound | Last Portion |
| NR-NI   | 0.159        | 0.157        | 0.554 |              | 0.125        | 0.129        | 0.291 |              | 0.052        | 0.053        | 0.954 |              | 0.171        | 0.169        | 0.405 |              | 0.176        | 0.171        | 0.502 |              |
| NR-I    | 0.143        | 0.142        | 0.543 |              | 0.108        | 0.108        | 0.279 |              | 0.044        | 0.043        | 0.530 |              | 0.160        | 0.161        | 0.393 |              | 0.167        | 0.161        | 0.382 |              |
| R-I T=2 | 0.147        | 0.144        | 0.598 | 0.365        | 0.125        | 0.126        | 0.444 | 0.292        | 0.051        | 0.053        | 0.799 | 0.428        | 0.166        | 0.166        | 0.453 | 0.332        | 0.172        | 0.170        | 0.466 | 0.350        |
| R-I T=6 | <b>0.115</b> | <b>0.112</b> | 0.563 | <b>0.289</b> | <b>0.092</b> | <b>0.090</b> | 0.401 | <b>0.216</b> | <b>0.018</b> | <b>0.019</b> | 0.931 | <b>0.191</b> | <b>0.117</b> | <b>0.119</b> | 0.558 | <b>0.255</b> | <b>0.142</b> | <b>0.139</b> | 0.643 | <b>0.306</b> |

Table 12: Normalized test error, train error and bound comparison for **Humanoid** considering **Intermediate** policy.

| Method  | E-SEED-01    |              |       |              | E-SEED-02    |              |       |              | E-SEED-03    |              |       |              | E-SEED-04    |              |       |              | E-SEED-05    |              |       |              |
|---------|--------------|--------------|-------|--------------|--------------|--------------|-------|--------------|--------------|--------------|-------|--------------|--------------|--------------|-------|--------------|--------------|--------------|-------|--------------|
|         | Train        | Test         | Bound | Last Portion | Train        | Test         | Bound | Last Portion | Train        | Test         | Bound | Last Portion | Train        | Test         | Bound | Last Portion | Train        | Test         | Bound | Last Portion |
| NR-NI   | 0.151        | 0.157        | 0.418 |              | 0.103        | 0.105        | 0.241 |              | 0.066        | 0.066        | 0.130 |              | 0.110        | 0.112        | 0.322 |              | 0.116        | 0.122        | 0.343 |              |
| NR-I    | 0.133        | 0.137        | 0.366 |              | 0.101        | 0.104        | 0.201 |              | 0.064        | 0.065        | 0.131 |              | 0.110        | 0.111        | 0.260 |              | 0.106        | 0.110        | 0.310 |              |
| R-I T=2 | 0.150        | 0.153        | 0.343 | 0.276        | 0.107        | 0.110        | 0.212 | 0.171        | 0.065        | 0.066        | 0.142 | 0.113        | 0.115        | 0.117        | 0.319 | 0.224        | 0.117        | 0.119        | 0.286 | 0.226        |
| R-I T=6 | <b>0.117</b> | <b>0.120</b> | 0.317 | <b>0.227</b> | <b>0.080</b> | <b>0.084</b> | 0.225 | <b>0.147</b> | <b>0.046</b> | <b>0.049</b> | 0.185 | <b>0.092</b> | <b>0.094</b> | <b>0.096</b> | 0.283 | <b>0.172</b> | <b>0.082</b> | <b>0.086</b> | 0.243 | <b>0.161</b> |

Table 13: Normalized test error, train error and bound comparison for **Humanoid** considering **Expert** policy.

| Method  | E-SEED-01    |              |       |              | E-SEED-02    |              |       |              | E-SEED-03    |              |       |              | E-SEED-04    |              |       |              | E-SEED-05    |              |       |              |
|---------|--------------|--------------|-------|--------------|--------------|--------------|-------|--------------|--------------|--------------|-------|--------------|--------------|--------------|-------|--------------|--------------|--------------|-------|--------------|
|         | Train        | Test         | Bound | Last Portion | Train        | Test         | Bound | Last Portion | Train        | Test         | Bound | Last Portion | Train        | Test         | Bound | Last Portion | Train        | Test         | Bound | Last Portion |
| NR-NI   | <b>0.095</b> | <b>0.098</b> | 0.268 |              | 0.073        | 0.071        | 0.177 |              | 0.081        | 0.088        | 0.244 |              | <b>0.082</b> | <b>0.083</b> | 0.261 |              | 0.106        | 0.102        | 0.284 |              |
| NR-I    | 0.104        | 0.107        | 0.229 |              | <b>0.067</b> | <b>0.066</b> | 0.153 |              | <b>0.062</b> | <b>0.066</b> | 0.188 |              | 0.085        | 0.086        | 0.217 |              | <b>0.101</b> | <b>0.098</b> | 0.241 |              |
| R-I T=2 | 0.109        | 0.114        | 0.285 | 0.193        | 0.072        | 0.071        | 0.161 | 0.121        | 0.074        | 0.077        | 0.216 | 0.153        | 0.115        | 0.115        | 0.305 | 0.223        | 0.135        | 0.128        | 0.323 | 0.238        |
| R-I T=6 | 0.102        | 0.107        | 0.269 | <b>0.176</b> | <b>0.067</b> | 0.067        | 0.163 | <b>0.110</b> | 0.076        | 0.078        | 0.229 | <b>0.147</b> | 0.091        | 0.092        | 0.270 | <b>0.175</b> | <b>0.101</b> | 0.099        | 0.288 | <b>0.190</b> |

Table 14: Normalized test error, train error and bound comparison for **Walker2d** considering **Starter** policy.

| Method  | E-SEED-01    |              |       |              | E-SEED-02    |              |       |              | E-SEED-03    |              |       |              | E-SEED-04    |              |       |              | E-SEED-05    |              |       |              |
|---------|--------------|--------------|-------|--------------|--------------|--------------|-------|--------------|--------------|--------------|-------|--------------|--------------|--------------|-------|--------------|--------------|--------------|-------|--------------|
|         | Train        | Test         | Bound | Last Portion | Train        | Test         | Bound | Last Portion | Train        | Test         | Bound | Last Portion | Train        | Test         | Bound | Last Portion | Train        | Test         | Bound | Last Portion |
| NR-NI   | 0.150        | 0.142        | 0.292 |              | 0.103        | 0.103        | 0.173 |              | 0.182        | 0.186        | 0.252 |              | 0.158        | 0.161        | 0.254 |              | 0.097        | 0.097        | 0.221 |              |
| NR-I    | 0.034        | 0.034        | 0.046 |              | 0.104        | 0.104        | 0.208 |              | 0.183        | 0.187        | 0.286 |              | 0.236        | 0.240        | 0.341 |              | 0.096        | 0.095        | 0.194 |              |
| R-I T=2 | 0.360        | 0.347        | 0.491 | 0.475        | 0.105        | 0.105        | 0.233 | 0.210        | 0.189        | 0.193        | 0.310 | 0.292        | 0.269        | 0.273        | 0.383 | 0.369        | 0.158        | 0.156        | 0.290 | 0.245        |
| R-I T=6 | <b>0.063</b> | <b>0.059</b> | 0.191 | <b>0.117</b> | <b>0.031</b> | <b>0.030</b> | 0.217 | <b>0.101</b> | <b>0.045</b> | <b>0.047</b> | 0.176 | <b>0.105</b> | <b>0.059</b> | <b>0.061</b> | 0.177 | <b>0.114</b> | <b>0.060</b> | <b>0.060</b> | 0.183 | <b>0.108</b> |

Table 15: Normalized test error, train error and bound comparison for **Walker2d** considering **Intermediate** policy.

| Method  | E-SEED-01    |              |       |              | E-SEED-02    |              |       |              | E-SEED-03    |              |       |              | E-SEED-04 |       |       |              | E-SEED-05    |              |       |              |
|---------|--------------|--------------|-------|--------------|--------------|--------------|-------|--------------|--------------|--------------|-------|--------------|-----------|-------|-------|--------------|--------------|--------------|-------|--------------|
|         | Train        | Test         | Bound | Last Portion | Train        | Test         | Bound | Last Portion | Train        | Test         | Bound | Last Portion | Train     | Test  | Bound | Last Portion | Train        | Test         | Bound | Last Portion |
| NR-NI   | 0.046        | 0.046        | 0.083 |              | 0.056        | 0.056        | 0.086 |              | 0.046        | 0.046        | 0.083 |              | 0.054     | 0.054 | 0.095 |              | 0.071        | 0.069        | 0.134 |              |
| NR-I    | 0.034        | 0.034        | 0.046 |              | 0.032        | 0.032        | 0.059 |              | 0.043        | 0.043        | 0.059 |              | 0.042     | 0.042 | 0.080 | 0.056        | 0.073        | 0.072        | 0.098 |              |
| R-I T=2 | 0.037        | 0.037        | 0.066 | 0.048        | 0.032        | 0.032        | 0.059 | <b>0.042</b> | <b>0.033</b> | <b>0.033</b> | 0.069 | <b>0.044</b> | 0.039     | 0.039 | 0.065 | 0.056        | 0.063        | 0.061        | 0.116 | 0.084        |
| R-I T=6 | <b>0.031</b> | <b>0.031</b> | 0.051 | <b>0.040</b> | <b>0.031</b> | <b>0.031</b> | 0.053 | <b>0.042</b> | 0.040        | 0.041        | 0.073 | 0.057        | 0.039     | 0.039 | 0.065 | <b>0.052</b> | <b>0.054</b> | <b>0.053</b> | 0.093 | <b>0.072</b> |

Table 16: Normalized test error, train error and bound comparison for **Walker2d** considering **Expert** policy.

| Method  | E-SEED-01    |              |       |              | E-SEED-02    |              |       |              | E-SEED-03    |              |       |              | E-SEED-04    |              |       |              | E-SEED-05    |              |       |              |
|---------|--------------|--------------|-------|--------------|--------------|--------------|-------|--------------|--------------|--------------|-------|--------------|--------------|--------------|-------|--------------|--------------|--------------|-------|--------------|
|         | Train        | Test         | Bound | Last Portion | Train        | Test         | Bound | Last Portion | Train        | Test         | Bound | Last Portion | Train        | Test         | Bound | Last Portion | Train        | Test         | Bound | Last Portion |
| NR-NI   | 0.088        | 0.086        | 0.181 |              | 0.039        | 0.040        | 0.073 |              | 0.048        | 0.048        | 0.090 |              | 0.051        | 0.051        | 0.092 |              | 0.071        | 0.071        | 0.119 |              |
| NR-I    | 0.090        | 0.091        | 0.130 |              | 0.045        | 0.047        | 0.060 |              | <b>0.039</b> | <b>0.039</b> | 0.052 |              | 0.056        | 0.056        | 0.075 |              | 0.046        | 0.046        | 0.061 |              |
| R-I T=2 | 0.084        | 0.084        | 0.157 | 0.114        | 0.039        | 0.040        | 0.070 | 0.049        | 0.040        | 0.040        | 0.075 | 0.051        | 0.043        | 0.042        | 0.076 | 0.054        | 0.064        | 0.064        | 0.107 | 0.079        |
| R-I T=6 | <b>0.076</b> | <b>0.072</b> | 0.127 | <b>0.106</b> | <b>0.034</b> | <b>0.035</b> | 0.054 | <b>0.043</b> | 0.040        | 0.040        | 0.063 | <b>0.050</b> | <b>0.041</b> | <b>0.041</b> | 0.068 | <b>0.053</b> | <b>0.043</b> | <b>0.043</b> | 0.068 | <b>0.053</b> |

## NeurIPS Paper Checklist

### 1. Claims

Question: Do the main claims made in the abstract and introduction accurately reflect the paper's contributions and scope?

Answer: [\[Yes\]](#)

Justification: We summarize our claims and approach in the last paragraph of the introduction and provide extensive evidence for them in Section 4.

Guidelines:

- The answer NA means that the abstract and introduction do not include the claims made in the paper.
- The abstract and/or introduction should clearly state the claims made, including the contributions made in the paper and important assumptions and limitations. A No or NA answer to this question will not be perceived well by the reviewers.
- The claims made should match theoretical and experimental results, and reflect how much the results can be expected to generalize to other settings.
- It is fine to include aspirational goals as motivation as long as it is clear that these goals are not attained by the paper.

### 2. Limitations

Question: Does the paper discuss the limitations of the work performed by the authors?

Answer: [\[Yes\]](#)

Justification: We discuss the limitations in Section 5.

Guidelines:

- The answer NA means that the paper has no limitation while the answer No means that the paper has limitations, but those are not discussed in the paper.
- The authors are encouraged to create a separate "Limitations" section in their paper.
- The paper should point out any strong assumptions and how robust the results are to violations of these assumptions (e.g., independence assumptions, noiseless settings, model well-specification, asymptotic approximations only holding locally). The authors should reflect on how these assumptions might be violated in practice and what the implications would be.
- The authors should reflect on the scope of the claims made, e.g., if the approach was only tested on a few datasets or with a few runs. In general, empirical results often depend on implicit assumptions, which should be articulated.
- The authors should reflect on the factors that influence the performance of the approach. For example, a facial recognition algorithm may perform poorly when image resolution is low or images are taken in low lighting. Or a speech-to-text system might not be used reliably to provide closed captions for online lectures because it fails to handle technical jargon.
- The authors should discuss the computational efficiency of the proposed algorithms and how they scale with dataset size.
- If applicable, the authors should discuss possible limitations of their approach to address problems of privacy and fairness.
- While the authors might fear that complete honesty about limitations might be used by reviewers as grounds for rejection, a worse outcome might be that reviewers discover limitations that aren't acknowledged in the paper. The authors should use their best judgment and recognize that individual actions in favor of transparency play an important role in developing norms that preserve the integrity of the community. Reviewers will be specifically instructed to not penalize honesty concerning limitations.

### 3. Theory assumptions and proofs

Question: For each theoretical result, does the paper provide the full set of assumptions and a complete (and correct) proof?

Answer: [\[Yes\]](#)



Justification: We either cite the original work or provide a proof ourselves for every theoretical statement in the paper.

Guidelines:

- The answer NA means that the paper does not include theoretical results.
- All the theorems, formulas, and proofs in the paper should be numbered and cross-referenced.
- All assumptions should be clearly stated or referenced in the statement of any theorems.
- The proofs can either appear in the main paper or the supplemental material, but if they appear in the supplemental material, the authors are encouraged to provide a short proof sketch to provide intuition.
- Inversely, any informal proof provided in the core of the paper should be complemented by formal proofs provided in appendix or supplemental material.
- Theorems and Lemmas that the proof relies upon should be properly referenced.

#### 4. Experimental result reproducibility

Question: Does the paper fully disclose all the information needed to reproduce the main experimental results of the paper to the extent that it affects the main claims and/or conclusions of the paper (regardless of whether the code and data are provided or not)?

Answer: [\[Yes\]](#)

Justification: Yes, we provide all required details required to guarantee reproducibility in the Appendix [C](#).

Guidelines:

- The answer NA means that the paper does not include experiments.
- If the paper includes experiments, a No answer to this question will not be perceived well by the reviewers: Making the paper reproducible is important, regardless of whether the code and data are provided or not.
- If the contribution is a dataset and/or model, the authors should describe the steps taken to make their results reproducible or verifiable.
- Depending on the contribution, reproducibility can be accomplished in various ways. For example, if the contribution is a novel architecture, describing the architecture fully might suffice, or if the contribution is a specific model and empirical evaluation, it may be necessary to either make it possible for others to replicate the model with the same dataset, or provide access to the model. In general, releasing code and data is often one good way to accomplish this, but reproducibility can also be provided via detailed instructions for how to replicate the results, access to a hosted model (e.g., in the case of a large language model), releasing of a model checkpoint, or other means that are appropriate to the research performed.
- While NeurIPS does not require releasing code, the conference does require all submissions to provide some reasonable avenue for reproducibility, which may depend on the nature of the contribution. For example
  - (a) If the contribution is primarily a new algorithm, the paper should make it clear how to reproduce that algorithm.
  - (b) If the contribution is primarily a new model architecture, the paper should describe the architecture clearly and fully.
  - (c) If the contribution is a new model (e.g., a large language model), then there should either be a way to access this model for reproducing the results or a way to reproduce the model (e.g., with an open-source dataset or instructions for how to construct the dataset).
  - (d) We recognize that reproducibility may be tricky in some cases, in which case authors are welcome to describe the particular way they provide for reproducibility. In the case of closed-source models, it may be that access to the model is limited in some way (e.g., to registered users), but it should be possible for other researchers to have some path to reproducing or verifying the results.

#### 5. Open access to data and code

Question: Does the paper provide open access to the data and code, with sufficient instructions to faithfully reproduce the main experimental results, as described in supplemental material?

Answer: [Yes]

Justification: The environments we use are publicly available, we reference the respective python packages in the appendix. We additionally provide a pytorch implementation of our proposed approach.

Guidelines:

- The answer NA means that paper does not include experiments requiring code.
- Please see the NeurIPS code and data submission guidelines (<https://nips.cc/public/guides/CodeSubmissionPolicy>) for more details.
- While we encourage the release of code and data, we understand that this might not be possible, so “No” is an acceptable answer. Papers cannot be rejected simply for not including code, unless this is central to the contribution (e.g., for a new open-source benchmark).
- The instructions should contain the exact command and environment needed to run to reproduce the results. See the NeurIPS code and data submission guidelines (<https://nips.cc/public/guides/CodeSubmissionPolicy>) for more details.
- The authors should provide instructions on data access and preparation, including how to access the raw data, preprocessed data, intermediate data, and generated data, etc.
- The authors should provide scripts to reproduce all experimental results for the new proposed method and baselines. If only a subset of experiments are reproducible, they should state which ones are omitted from the script and why.
- At submission time, to preserve anonymity, the authors should release anonymized versions (if applicable).
- Providing as much information as possible in supplemental material (appended to the paper) is recommended, but including URLs to data and code is permitted.

## 6. Experimental setting/details

Question: Does the paper specify all the training and test details (e.g., data splits, hyper-parameters, how they were chosen, type of optimizer, etc.) necessary to understand the results?

Answer: [Yes]

Justification: We provide all experimental details in Appendix C.

Guidelines:

- The answer NA means that the paper does not include experiments.
- The experimental setting should be presented in the core of the paper to a level of detail that is necessary to appreciate the results and make sense of them.
- The full details can be provided either with the code, in appendix, or as supplemental material.

## 7. Experiment statistical significance

Question: Does the paper report error bars suitably and correctly defined or other appropriate information about the statistical significance of the experiments?

Answer: [Yes]

Justification: We report error bars for all experiments and define them in Appendix C.

Guidelines:

- The answer NA means that the paper does not include experiments.
- The authors should answer "Yes" if the results are accompanied by error bars, confidence intervals, or statistical significance tests, at least for the experiments that support the main claims of the paper.
- The factors of variability that the error bars are capturing should be clearly stated (for example, train/test split, initialization, random drawing of some parameter, or overall run with given experimental conditions).

- The method for calculating the error bars should be explained (closed form formula, call to a library function, bootstrap, etc.)
- The assumptions made should be given (e.g., Normally distributed errors).
- It should be clear whether the error bar is the standard deviation or the standard error of the mean.
- It is OK to report 1-sigma error bars, but one should state it. The authors should preferably report a 2-sigma error bar than state that they have a 96% CI, if the hypothesis of Normality of errors is not verified.
- For asymmetric distributions, the authors should be careful not to show in tables or figures symmetric error bars that would yield results that are out of range (e.g. negative error rates).
- If error bars are reported in tables or plots, The authors should explain in the text how they were calculated and reference the corresponding figures or tables in the text.

## 8. Experiments compute resources

Question: For each experiment, does the paper provide sufficient information on the computer resources (type of compute workers, memory, time of execution) needed to reproduce the experiments?

Answer: [Yes]

Justification: We discuss the required computational resources in the main paper in Section 4 and in Appendix C.

Guidelines:

- The answer NA means that the paper does not include experiments.
- The paper should indicate the type of compute workers CPU or GPU, internal cluster, or cloud provider, including relevant memory and storage.
- The paper should provide the amount of compute required for each of the individual experimental runs as well as estimate the total compute.
- The paper should disclose whether the full research project required more compute than the experiments reported in the paper (e.g., preliminary or failed experiments that didn't make it into the paper).

## 9. Code of ethics

Question: Does the research conducted in the paper conform, in every respect, with the NeurIPS Code of Ethics <https://neurips.cc/public/EthicsGuidelines>?

Answer: [Yes]

Justification: We carefully checked the guidelines and follow them in this submission.

Guidelines:

- The answer NA means that the authors have not reviewed the NeurIPS Code of Ethics.
- If the authors answer No, they should explain the special circumstances that require a deviation from the Code of Ethics.
- The authors should make sure to preserve anonymity (e.g., if there is a special consideration due to laws or regulations in their jurisdiction).

## 10. Broader impacts

Question: Does the paper discuss both potential positive societal impacts and negative societal impacts of the work performed?

Answer: [Yes]

Justification: Please see Section 5 for the discussion.

Guidelines:

- The answer NA means that there is no societal impact of the work performed.
- If the authors answer NA or No, they should explain why their work has no societal impact or why the paper does not address societal impact.

- Examples of negative societal impacts include potential malicious or unintended uses (e.g., disinformation, generating fake profiles, surveillance), fairness considerations (e.g., deployment of technologies that could make decisions that unfairly impact specific groups), privacy considerations, and security considerations.
- The conference expects that many papers will be foundational research and not tied to particular applications, let alone deployments. However, if there is a direct path to any negative applications, the authors should point it out. For example, it is legitimate to point out that an improvement in the quality of generative models could be used to generate deepfakes for disinformation. On the other hand, it is not needed to point out that a generic algorithm for optimizing neural networks could enable people to train models that generate Deepfakes faster.
- The authors should consider possible harms that could arise when the technology is being used as intended and functioning correctly, harms that could arise when the technology is being used as intended but gives incorrect results, and harms following from (intentional or unintentional) misuse of the technology.
- If there are negative societal impacts, the authors could also discuss possible mitigation strategies (e.g., gated release of models, providing defenses in addition to attacks, mechanisms for monitoring misuse, mechanisms to monitor how a system learns from feedback over time, improving the efficiency and accessibility of ML).

## 11. Safeguards

Question: Does the paper describe safeguards that have been put in place for responsible release of data or models that have a high risk for misuse (e.g., pretrained language models, image generators, or scraped datasets)?

Answer: [NA]

Justification: The submission poses no such risks.

Guidelines:

- The answer NA means that the paper poses no such risks.
- Released models that have a high risk for misuse or dual-use should be released with necessary safeguards to allow for controlled use of the model, for example by requiring that users adhere to usage guidelines or restrictions to access the model or implementing safety filters.
- Datasets that have been scraped from the Internet could pose safety risks. The authors should describe how they avoided releasing unsafe images.
- We recognize that providing effective safeguards is challenging, and many papers do not require this, but we encourage authors to take this into account and make a best faith effort.

## 12. Licenses for existing assets

Question: Are the creators or original owners of assets (e.g., code, data, models), used in the paper, properly credited and are the license and terms of use explicitly mentioned and properly respected?

Answer: [Yes]

Justification: We credit the python environments and packages we rely on in the appendix.

Guidelines:

- The answer NA means that the paper does not use existing assets.
- The authors should cite the original paper that produced the code package or dataset.
- The authors should state which version of the asset is used and, if possible, include a URL.
- The name of the license (e.g., CC-BY 4.0) should be included for each asset.
- For scraped data from a particular source (e.g., website), the copyright and terms of service of that source should be provided.
- If assets are released, the license, copyright information, and terms of use in the package should be provided. For popular datasets, [paperswithcode.com/datasets](https://paperswithcode.com/datasets) has curated licenses for some datasets. Their licensing guide can help determine the license of a dataset.

- For existing datasets that are re-packaged, both the original license and the license of the derived asset (if it has changed) should be provided.
- If this information is not available online, the authors are encouraged to reach out to the asset's creators.

### 13. New assets

Question: Are new assets introduced in the paper well documented and is the documentation provided alongside the assets?

Answer: [NA]

Justification: The submission does not introduce any new assets.

Guidelines:

- The answer NA means that the paper does not release new assets.
- Researchers should communicate the details of the dataset/code/model as part of their submissions via structured templates. This includes details about training, license, limitations, etc.
- The paper should discuss whether and how consent was obtained from people whose asset is used.
- At submission time, remember to anonymize your assets (if applicable). You can either create an anonymized URL or include an anonymized zip file.

### 14. Crowdsourcing and research with human subjects

Question: For crowdsourcing experiments and research with human subjects, does the paper include the full text of instructions given to participants and screenshots, if applicable, as well as details about compensation (if any)?

Answer: [NA]

Justification: The submission does not rely on human subjects.

Guidelines:

- The answer NA means that the paper does not involve crowdsourcing nor research with human subjects.
- Including this information in the supplemental material is fine, but if the main contribution of the paper involves human subjects, then as much detail as possible should be included in the main paper.
- According to the NeurIPS Code of Ethics, workers involved in data collection, curation, or other labor should be paid at least the minimum wage in the country of the data collector.

### 15. Institutional review board (IRB) approvals or equivalent for research with human subjects

Question: Does the paper describe potential risks incurred by study participants, whether such risks were disclosed to the subjects, and whether Institutional Review Board (IRB) approvals (or an equivalent approval/review based on the requirements of your country or institution) were obtained?

Answer: [NA]

Justification: The submission does not rely on human subjects.

Guidelines:

- The answer NA means that the paper does not involve crowdsourcing nor research with human subjects.
- Depending on the country in which research is conducted, IRB approval (or equivalent) may be required for any human subjects research. If you obtained IRB approval, you should clearly state this in the paper.
- We recognize that the procedures for this may vary significantly between institutions and locations, and we expect authors to adhere to the NeurIPS Code of Ethics and the guidelines for their institution.
- For initial submissions, do not include any information that would break anonymity (if applicable), such as the institution conducting the review.



995 **16. Declaration of LLM usage**  
996 Question: Does the paper describe the usage of LLMs if it is an important, original, or  
997 non-standard component of the core methods in this research? Note that if the LLM is used  
998 only for writing, editing, or formatting purposes and does not impact the core methodology,  
999 scientific rigorousness, or originality of the research, declaration is not required.  
1000 Answer: [NA]  
1001 Justification: The submission does not rely on LLMs for any of its research.  
1002 Guidelines:  
1003 • The answer NA means that the core method development in this research does not  
1004 involve LLMs as any important, original, or non-standard components.  
1005 • Please refer to our LLM policy (<https://neurips.cc/Conferences/2025/LLM>)  
1006 for what should or should not be described.
